# Supplementary material for: Does Employer-Paid, Job-Protected Maternity Leave Help or Hurt Female IT Workers? Evidence from Millions of Job Applications
Source: Atypon-hosted journal article supplement (doi:10.1287/mnsc.2021.00380), 2025-03-31
Supplement: mnsc.2021.00380.sm1.pdf [file mnsc.2021.00380.sm1.pdf]

**Does Employer-Paid, Job-Protected Maternity Leave Help or Hurt Female IT  
Workers? Evidence from Millions of Job Applications**

**Online Appendix**

**Sofia Bapna**

Associate Professor  
Information and Decision Sciences  
Carlson School of Management  
University of Minnesota

**Russell J. Funk**

Associate Professor  
Strategic Management and Entrepreneurship  
Carlson School of Management  
University of Minnesota

## APPENDICES

### APPENDIX 1: JOB TITLES BY ROLE (LISTED ALPHABETICALLY)

#### SOFTWARE ENGINEER

.NET  
.NET - MVC DEVELOPER  
WCF  
.NET APPLICATION  
SUPPORT ENGINEER  
.NET CONTRACTORS  
.NET DEVELOPER  
.NET DEVELOPER  
ANGULAR JS  
.NET DEVELOPER (DAY  
SHIFT)  
.NET DEVELOPER - WPF  
.NET DEVELOPER /  
SOFTWARE DEVELOPER  
.NET DEVELOPER  
TRAINEE  
.NET DEVELOPER..  
.NET  
DEVELOPERFRESHERS  
.NET DEVELOPERS  
.NET DEVELOPER  
.NET FRESHER  
.NET INTERN  
.NET LEAD / DEVELOPER  
.NET MVC WITH ANGULAR  
JS/JQUERY  
.NET PROGRAMMER  
.NET SOFTWARE  
DEVELOPER  
.NET SOFTWARE  
DEVELOPMENT /  
SUPPORT  
.NET SOFTWARE  
ENGINEER  
.NET TRAINEE  
.NET TRAINERS  
.NET WEB DEVELOPER  
.NET WEB DEVELOPER -  
MVC  
2D ANIMATOR  
3D GAME DEVELOPER  
ACE JAVASCRIPT  
DEVELOPER  
ADOBE CQ/AEM  
AI/ARCHITECT  
AIX ADMIN

ANALYST  
ANALYST - ENTERPRISE  
TECH SERVICES  
ANALYST PROGRAMMER  
ANALYST- SD OPS  
ANALYTICAL TESTING  
INTERN  
ANDRIOD DEVELOPER  
ANDROID/IOS TRAINEE  
ANGULAR 2 DEVELOPER  
ANGULAR 4 UI  
DEVELOPER  
ANGULAR 5 DEVELOPER  
ANGULAR DEVELOPER  
ANGULAR JS 2.0  
ANGULAR JS DEVELOPER  
ANGULAR JS JD  
ANGULAR JS SENIOR  
DEVELOPER  
ANGULAR JS TRAINEE  
ANGULAR.JS DEVELOPER  
ANGULAR/NODE  
DEVELOPER  
ANGULAR2 DEVELOPER  
ANGULARJS DEVELOPER  
ANGULARJS DEVELOPERS  
APACHE CORDOVA  
DEVELOPER  
APP DEVELOPER  
APP DEVELOPER IOS/  
ANDROID  
APPLICATION  
CONSULTANT  
APPLICATION DEVELOPER  
APPLICATION DEVELOPER  
- TRAINEE  
APPLICATION DEVELOPER  
ANGULAR  
APPLICATION  
DEVELOPER/TESTER  
APPLICATION  
DEVELOPMENT ENGINEER  
APPLICATION ENGINEER  
APPLICATION ENGINEER /  
ASSOCIATE DATABASE  
DEVELOPER/ ASSOCIATE  
WEB DEVELOPER

APPLICATION SOFTWARE  
DEVELOPER  
APPLICATION SUPPORT  
ANALYST  
APPLICATION SUPPORT  
ENGINEER  
APPLICATION SUPPORT  
EXECUTIVE  
APPLICATIONS  
DEVELOPMENT ENGINEER  
AS400 DEVELOPER  
ASE-TRAINEE  
ASP .NET DEVELOPER  
ASP .NET SENIOR  
DEVELOPER  
ASP DEVELOPER  
ASP DOT NET DEVELOPER  
ASP. NET DEVELOPER  
ASP.NET  
ASP.NET -SOFTWARE  
ENGINEER-  
ASP.NET / C DEVELOPER  
ASP.NET C DEVELOPER  
ASP.NET DEVELOPER  
ASP.NET DEVELOPERS  
ASP.NET MVC DEVELOPER  
ASP.NET MVC  
DEVELOPERS  
ASP.NET MVC  
PROGRAMMERS  
ASP.NET MVC WEB  
DEVELOPER  
ASP.NET PROGRAMMER  
ASP.NET SOFTWARE  
DEVELOPER  
ASP.NET WEB  
DEVELOPER  
ASP.NET WITH ANGULAR  
JS  
ASP.NET WITH MVC  
ASP.NET/C DEVELOPER  
ASP.NETC DEVELOPER  
ASPNET DEVELOPER  
ASSISTANT PHP  
DEVELOPER  
ASSISTANT SOFTWARE  
DEVELOPER

ASSISTANT SOFTWARE DEVELOPER- TRAINEE  
ASSISTANT SOFTWARE ENGINEER  
ASSISTANT SOFTWARE ENGINEER TRAINEE  
ASSISTANT SYSTEMS ENGINEER  
ASSOCIATE SOFTWARE ENGINEER  
ASSOCIATE APPLICATION SPECIALIST  
ASSOCIATE BUSINESS ANALYST  
ASSOCIATE BUSINESS SYSTEMS ANALYST  
ASSOCIATE CONSULTANT  
ASSOCIATE CONSULTANT TECHNICAL  
ASSOCIATE CONSULTANT TECHNICAL ERP  
ASSOCIATE CUSTOMER SOLUTIONS ANALYST  
ASSOCIATE DELIVERY SPECIALIST & ASSOCIATE PROJECT MANAGER  
ASSOCIATE DEVELOPER  
ASSOCIATE DEVELOPER - ANGULAR.JS  
ASSOCIATE DEVELOPER .NET  
ASSOCIATE DEVELOPER SAP ABAP  
ASSOCIATE ENGINEER  
ASSOCIATE ENGINEER DESIGN DEVELOPMENT  
ASSOCIATE ENGINEER, SOFTWARE  
ASSOCIATE ENGINEER-SYSTEMS  
ASSOCIATE ENTERPRISE APP ADMIN  
ASSOCIATE ERP CONSULTANT  
ASSOCIATE GAME DEVELOPER  
ASSOCIATE GRADUATE ENGINEER TRAINEE  
ASSOCIATE JAVA DEVELOPER  
ASSOCIATE PRODUCT DEVELOPER  
ASSOCIATE PROGRAMMERS ASP.NET  
ASSOCIATE PROJECT MANAGER

ASSOCIATE QUALITY ENGINEER  
ASSOCIATE SOFTWARE DEVELOPER  
ASSOCIATE SOFTWARE DEVELOPER TRAINEE  
ASSOCIATE SOFTWARE ENGINEER  
ASSOCIATE SOFTWARE ENGINEER  
ASSOCIATE SOFTWARE ENGINEER (ANDROID/IOS/TESTING)  
ASSOCIATE SOFTWARE ENGINEER - JAVASCRIPT  
ASSOCIATE SOFTWARE ENGINEER TESTING  
ASSOCIATE SOFTWARE ENGINEER TRAINEE  
ASSOCIATE SOFTWARE ENGINEER- DEVELOPER / QA - TESTING  
ASSOCIATE SOFTWARE ENGINEER-JAVA  
ASSOCIATE SOFTWARE ENGINEER-QA  
ASSOCIATE SOFTWARE ENGINEER.  
ASSOCIATE SOFTWARE ENGINEER/ ASSOCIATE QUALITY ENGINEER  
ASSOCIATE SOFTWARE ENGINEER/ ASSOCIATE SOFTWARE CONSULTANT  
ASSOCIATE SOFTWARE ENGINEERPHP  
ASSOCIATE SOFTWARE MAINTENANCE ENGINEER - INTERNSHIP  
ASSOCIATE SOFTWARE PROGRAMMER  
ASSOCIATE SOFTWARE TEST ENGINEER  
ASSOCIATE SOFTWARE TRAINEE / ASSOCIATE SOFTWARE DEVELOPER  
ASSOCIATE SYSTEM ENGINEER  
ASSOCIATE SYSTEMS ANALYST  
ASSOCIATE SYSTEMS ENGINEER ANALYST  
ASSOCIATE TECHNICAL ARCHITECT  
ASSOCIATE TECHNICAL CONSULTANT

ASSOCIATE TECHNICAL CONSULTANT/ SOFTWARE ENGINEER  
ASSOCIATE TECHNICAL SUPPORT  
ASSOCIATE TECHNOLOGY  
ASSOCIATE TEST ENGINEER  
ASSOCIATE TRAINING CONSULTANT  
ASSOCIATE/TECHNICAL SUPPORT ENGINEER TRAINEES  
ASSOCIATE SOFTWARE DEVELOPER  
ASST. SOFTWARE ENGINEER  
ASTERISK ENGINEER/DEVELOPER  
AUTOCAD DESIGNER  
AUTOMATION TEST ENGINEER  
AUTOMATION TEST ENGINEER TRAINEE  
AUTOMATION TESTER / TEST ANALYST  
AUTOMATION TESTER-QTP  
AUTOMATION TESTER-SELENIUM  
AUTOSAR DEVELOPER  
AVALOQ DEVELOPER  
AXAPTA TECHNICAL LEAD  
AZURE ENGINEER  
AZURE MACHINE LEARNING  
BACK END DEVELOPER  
BACK-END DEVELOPER  
BACK-END JAVA DEVELOPER  
BACKEND DEVELOPER  
BACKEND DEVELOPERS  
BACKEND ENGINEER  
BACKEND FRONTEND PROGRAMMER  
BACKEND SENIOR ENGINEER  
BENCHSALE RECRUITERS  
BI DEVELOPER  
BI/TOOLS TRAINER  
BIG DATA DEVELOPER  
BIG DATA SOFTWARE ENGINEER  
BIG DATA TESTER  
BIG DATA-HADOOP TRAINER

BIGDATA CONSULTANT  
BLOCKCHAIN RESEARCH  
ENGINEER  
BSC FRESHER  
BUILD/ TEST ENGINEER  
BUSINESS ANALYST  
TRAINEE  
BUSINESS DEVELOPMENT  
EXECUTIVE  
BUSINESS DEVELOPMENT  
OFFICER  
BUSINESS INTELLIGENCE  
DEVELOPER  
C HTML DEVELOPER  
C .NET DEVELOPER  
C DEVELOPER  
C DEVELOPER/API  
ENGINEER  
C DEVELOPERS  
C DOTNET DEVELOPER  
C PROGRAMMERS  
C SHARP .NET  
DEVELOPER  
C# ASP.NET SOFTWARE  
DEVELOPER  
C# MVC DEVELOPER  
C.NET DESKTOP APP  
DEVELOPER  
CAD / CAM SOFTWARE  
DEVELOPER  
CAKE PHP DEVELOPER  
CHIEF TECHNOLOGY  
OFFICER  
CHILLED JAVA GEEKS  
CIVIL SOFTWARE  
ENGINEER  
CLOUD CX CONSULTANT -  
TRAINEE  
CLOUD ENGINEER  
CLOUD ENGINEER  
TRAINEE  
CLOUD PLATFORM  
ENGINEER  
CLOUD SYSTEMS  
ADMINISTRATOR  
CLOUD SYSTEMS  
ENGINEER LINUX /  
WINDOWS  
CLOUD SYSTEMS  
ENGINEER LINUX /  
WINDOWS  
CLOUDOPS ENGINEER  
CMS DEVELOPER  
CNC PROGRAMMER  
COBOL DEVELOPER

COCOS2DX GAME  
DEVELOPER  
CODEIGNITER  
DEVELOPER  
CODEIGNITER-PHP/SR.  
PHP DEVELOPER  
CODEIGNITOR  
DEVELOPER  
COMPUTER  
PROGRAMMER  
CONSTRUCTION PLANNER  
CONTENT WRITER  
CONTENT/BLOG WRITER  
WITH SOCIAL MARKETING  
SKILLS  
CONTRACT ENGINEER  
SOFTWARE  
CORE / TRAINEE  
SOFTWARE ENGINEER  
CORE JAVA DEVELOPER  
CORE JAVA DEVELOPER  
CORE PHP DEVELOPER  
CORE PHP DEVELOPERS  
CORE WEB PHP  
DEVELOPERS  
CREATIVE UI DESIGNER /  
DEVELOPER  
CRM ERP DEVELOPER  
CUSTOMER SUPPORT  
CENTER  
CUSTOMER SUPPORT  
ENGINEER  
CX CLOUD CONSULTANT-  
TRAINEE  
DATA ANALYST  
DATA ANALYTICS INTERN  
DATA ANALYTICS TEST  
ENGINEER TRAINEE  
DATA ENGINEER  
DATA MIGRATION  
PROGRAMMER  
DATA MINING ENGINEER  
DATA OPERATIONS  
DEVELOPER  
DATA SCIENCE  
DATA SCIENTIST  
DATA SCIENTIST -  
STATISTICS  
DATA/ QUALITY ANALYST  
DATA/ SOFTWARE  
DEVELOPER  
DATA/QUALITY ANALYST  
DATABASE  
ADMINISTRATOR

DATABASE  
ARCHITECT/DESIGNER  
DATABASE DEVELOPER  
DATABASE SERVER  
ADMIN  
DECISION ANALYTICS  
ASSOCIATE  
DEMANDWARE  
DEVELOPER  
DEPLOYMENT ENGINEER  
DESIGN ENGINEER  
DESIGNER/WEB  
DEVELOPER / UI  
DESIGNER / GRAPHIC  
DESIGNER  
DESKTOP APPLICATION  
DEVELOPER  
DESKTOP ENGINEER  
DESKTOP SUPPORT FIELD  
ENGINEER  
DEV OPS/SYSTEMS  
ENGINEER  
DEVELOPER  
DEVELOPER - FRONT END  
DEVELOPER - JAVA FULL  
STACK  
DEVELOPER - WEB  
SERVICES  
DEVELOPER PHP  
DEVELOPER TRAINEE  
DEVELOPER UI  
DEVELOPMENT ENGINEER  
DEVELOPMENT OFFICER  
DEVELOPMENT/ TEST  
ENGINEER - MOBILE  
APPLICATIONS  
DEVOPS DEVELOPER  
DEVOPS ENGINEER  
DEVOPS-SERVICE  
DELIVERY ENGINEERS  
DIGITAL ANALYST  
DIGITAL ASSOCIATE  
DIGITAL MARKETING  
DIGITAL MARKETING (PAY  
PER CLICK)  
DIGITAL PROGRAMMER  
DIGITAL VERIFICATION  
ENGINEER I  
DJANGO DEVELOPER  
DOT DEVELOPER  
DOT NET DEVELOPER  
DOT NET / TESTING  
(SELENIUM TRAINED) /  
MOBILE APPLICATION  
(IOS) / JAVA

DOT NET C SHARP  
DEVELOPER  
DOT NET DEVELOPER  
DOT NET DEVELOPERS  
DOT NET DEVLOPER  
DOT NET FRESHER  
DOT NET PROGRAMMER  
DOT NET PROGRAMMERS  
DOT NET SOFTWARE  
DEVELOPER  
PROGRAMMER  
DOT NET SOFTWARE  
DEVELOPERS  
DOT NET TEAM LEADRES  
DOT NET TRAINEE  
DOT NET TRAINER  
DOT-NET DEVELOPER  
DOT.NET DEVELOPER  
DOTNET / IOS SOFTWARE  
DEVELOPER  
DOTNET AND HTML  
DEVELOPER  
DOTNET DEVELOPER  
DOTNET DEVELOPER  
PLSQL DEVELOPER  
DOTNET DEVELOPERS  
DOTNET FACULTY AND  
JAVA FACULTY  
DOTNET TRAINEE  
DRUAPL DEVELOPER  
DRUPAL DEVELOPER  
DRUPAL PROGRAMMER  
DRUPAL/JOOMLA/WORD  
PRESS DEVELOPER  
DSP ENGINEER/  
SOFTWARE ENGINEER  
DYNAMIC ECOMMERCE  
WEBSITE DEVELOPER  
E PUB OPERATOR  
E-COMMERCE  
DEVELOPER-TRAINEE  
EDI DEVELOPER  
ELECTRONICS  
EMBEDDED DEVELOPER  
EMAIL CAMPAIGN  
MANAGER  
EMBEDDED  
EMBEDDED / SOFTWARE  
DEVELOPER  
EMBEDDED C DEVELOPER  
EMBEDDED DESIGN  
ENGINEER  
EMBEDDED DEVELOPER  
EMBEDDED ENGINEER  
TRAINEE

EMBEDDED FIRMWARE  
ENGINEER  
EMBEDDED HARDWARE  
DESIGN ENGINEER  
EMBEDDED SOFTWARE  
DEVELOPER  
EMBEDDED SOFTWARE  
DEVELOPMENT  
EMBEDDED SOFTWARE  
DEVELOPMENT ENGINEER  
EMBEDDED SOFTWARE  
ENGINEER  
EMBEDDED SOFTWARE  
ENGINEER - LINUX  
EMBEDDED SOFTWARE  
PROGRAMMER  
EMBEDDED SYSTEM  
DEVELOPER  
EMBEDDED SYSTEM  
ENGINEER  
EMBEDDED SYSTEMS  
EMBEDDED SYSTEMS  
ENGINEER  
ENGINEER  
ENGINEER AR / VR  
GAMIFICATION  
ENGINEER PROJECTS  
ENGINEER TRAINEE - ITIS  
ENGINEER-TRAINEE  
ENTERPRISE JAVA  
DEVELOPER  
EPUB PROGRAMMER  
ERP DEVELOPER  
ERP TECHNO  
FUNCTIONAL  
CONSULTANT  
EXPERIENCE E PUB TECH  
EXPERIENCED PHP  
DEVELOPER  
EXPERT ERLANG  
DEVELOPER SENIOR  
ERLANG ENGINEER  
EXT JS DEVELOPER  
FIELD-PROGRAMMABLE  
GATE ARRAY FPGA  
FILENET DEVELOPER  
FIRMWARE  
DEVELOPMENT ENGINEER  
FIRMWARE ENGINEER  
FLASH AND ANIMATED  
SOFTWARE DEVELOPER  
FMS ENGINEER  
HARDWARE NETWORKING  
FO ENGINEER  
FQA - QA TESTER  
FRESH ENGINEERS

FRESHER DEVOPS  
ENGINEER  
FRESHER II QA TRAINEE  
FRESHER PHP  
DEVELOPER  
FRESHER SOFTWARE  
ENGINEER  
FRESHERS  
FRONT END / UI  
DEVELOPER  
FRONT END ANALYST  
FRONT END ANGULAR JS  
FRONT END DEVELOPER  
FRONT END DEVELOPER -  
ANGULAR JS  
FRONT END DEVELOPER  
ANGULAR JS  
FRONT END  
DEVELOPER/WEB  
DESIGNER  
FRONT END DEVELPER  
ANGULAR  
FRONT END ENGINEER  
TRAINEE  
FRONT END UI  
DEVELOPER  
FRONT END WEB  
DEVELOPER  
FRONT-END DEVELOPER  
FRONT-END WEB  
DEVELOPER  
FRONT-END/ UI  
DEVELOPER  
FRONTED/ WEB  
DEVELOPER  
FRONTEND DEVELOPER  
FRONTEND DEVELOPERS  
FRONTEND  
PROGRAMMER  
FRONTEND WEB  
DESIGNER  
FRONTEND WEB  
DEVELOPER  
FULL STACK DEVELOPER  
FULL STACK DEVELOPER -  
ANGULAR  
FULL STACK DEVELOPER -  
TECH GEEK  
FULL STACK DEVELOPER  
NODE JS  
FULL STACK DEVELOPER-  
SOFTWARE ENGINEER  
FULL STACK DEVLOPER  
FULL STACK EMPLOYER  
FULL STACK JAVA  
DEVELOPER

FULL STACK JAVA  
TRAINEE  
FULL STACK PRODUCT  
ENGINEER  
FULL STACK SOFTWARE  
DEVELOPER  
FULL STACK SOFTWARE  
ENGINEER  
FULL STACK WEB  
DEVELOPER  
FULL-STACK DEVELOPER  
FULL-STACK ENGINEER  
FULL-STACK WEB  
DEVELOPER  
FULLSTACK DEVELOPER  
FULLSTACK WEB  
DEVELOPER  
FULLSTACKDEVELOPER  
FUNCTIONAL  
CONSULTANT  
GAME DEVELOPER  
GAME TESTER TRAINEE  
GAME TESTING QUALITY  
ASSURANCE ENGINEER  
GFS TECH TRAINEE  
GIS ENGINEER  
GRADUATE ENGINEER  
TRAINEE  
GRADUATE ENGINEER  
TRAINEE GET  
GRADUATE SOFTWARE  
ENGINEER  
GRADUATE TRAINEE  
ENGINEER  
GRAPHIC WEB DESIGNER  
GRAPHIC DESIGNER  
GRAPHIC DESIGNER  
ANIMATION  
GRAPHIC DESIGNER / WEB  
DESIGNER  
GRAPHIC DESIGNER  
ILLUSTRATOR / COREL  
GRAPHIC DESIGNER UI/UX  
DESIGNER  
GRAPHIC DESIGNERS  
GRAPHIC DESINGER  
GRAPHIC UI DESIGNER  
GRAPHIC/WEB DESIGNER  
GRAPHIC/WEB DESIGNER  
ROLE  
GRAPHICS AND UI  
DESIGNER  
GRAPHICS DESIGNER  
TRAINEE  
GRAPHICS DEVELOPER

GRAPHICS WEB  
DESIGNER  
HADOOP DEVELOPER  
HAPPAY - SOFTWARE  
ENGINEER - FRONT END -  
UI/JAVASCRIPT  
HARDWARE TESTING  
TRAINEE  
HELP DESK CO-  
ORDINATOR  
HIRING ASSOCIATE  
SOFTWARE ENGINEER IN  
.NET/PHP/ANDROID-  
HIRING FOR PHP  
DEVELOPER1-6 YEARS  
HR TRAINEE  
HTML 5  
HTML 5 SENIOR  
DEVELOPER  
HTML CODER  
HTML CSS PHP  
DEVELOPER  
HTML DESIGNER  
HTML DEVELOPER  
HTML DEVELOPER CUM  
WEB DESIGNER  
HTML FRONTEND  
DEVELOPER  
HTML PROGRAMMER  
HTML SPECIALIST  
HTML TRAINEE  
HTML/XML DEVELOPER  
HVAC ENGINEER  
HYBRID APP DEVELOPER  
HYBRIS DEVELOPER  
HYPERION TESTER  
IBM BPM DEVELOPER  
IBM MOBILE FIRST  
DEVELOPER WITH IOS  
SKILLS  
IBM WTX DEVELOPER  
IMMEDIATE OPENINGS  
FOR FRESHERS (2012-  
2015)- MOBILE APP  
DEVELOPERS  
IMPLEMENTATION  
ENGINEER  
IMPLEMENTATION  
SOFTWARE ENGINEER  
TRAINEE  
IMPLEMENTATION/SUPPO  
RT ENGINEER  
INFORMATICA/TERADATA  
DEVELOPER

INFORMATION SECURITY  
ANALYST  
INFRASTRUCTURE  
ENGINEER  
INTEGRATION SPECIALIST  
INTERACTION DESIGNER  
AND VISUAL DESIGNER  
INTERN  
INTERN SOFTWARE  
ENGINEER / SOFTWARE  
ENGINEER  
INTERN - SOFTWARE  
DEVELOPER  
INTERN - SOFTWARE  
ENGINEER  
INTERNS  
INTERNSHIP PROJECTS  
AVAILABLE (MCA / BCA)  
IONIC DEVELOPER  
IOS / ANDROID  
DEVELOPER  
IOS ANDROID DEVELOPER  
IOS DEVELOPER IPHONE  
DEVELOPER  
IOS DEVELOPERS  
IOS DEVELOPERS /  
ASP.NET DEVELOPERS  
IOS SOFTWARE  
DEVELOPER  
IOS SWIFT DEVELOPER  
IOS/ANDROID TRAINEE  
IOT DEVELOPER  
IOT DEVELOPMENT WITH  
CLOUD AWS  
IPHONE APPLICATION  
DEVELOPER  
IPHONE DEVELOPER -  
AHMEDABAD  
IT ADMIN MANAGER  
IT ADMINISTRATOR  
IT ANALYST  
IT DEVELOPER  
IT DEVELOPER AND  
SOFTWARE ENGINEER  
IT HARDWARE AND  
NETWORKING ENGINEER  
IT IS ENGINEER TRAINEE  
IT PROJECT MANAGER  
IT RECRUITER  
IT SERVICE DESK  
ENGINEER  
IT SOFTWARE  
DEVELOPER  
IT SOFTWARE  
DEVELOPER TRAINEE

IT SOFTWARE DEVELOPERS  
IT SOFTWARE ENGINEER  
IT SOFTWARE ENGINEER - CONTRACT  
IT SOFTWARE ENGINEER ASSOCIATE - MEMBER OF TECHNICAL STAFF  
IT SUPPORT ENGINEERS  
IT TRAINEE  
IT-PROGRAMMER ANALYST  
IVR/ASTERISK DEVELOPER  
IVR/XML DEVELOPER  
J2EE / JAVA DEVELOPERS  
JAVA PROGRAMMER  
JAVA / J2EE DEVELOPERS - SPRING / HIBERNATE  
JAVA AND .NET TRAINED FRESHERS  
JAVA AND ANDROID DEVELOPERS  
JAVA APPLICATION DEVELOPER  
JAVA BILLING LEAD  
JAVA DEVELOPE  
JAVA DEVELOPER  
JAVA DEVELOPER - BACK END  
JAVA DEVELOPER FRESHERS  
JAVA DEVELOPER INTERNATIONAL BUSINESS  
JAVA DEVELOPER TRAINEE  
JAVA DEVELOPER WITH ANGULAR JS  
JAVA DEVELOPERS  
JAVA DEVELOPERS / .NET DEVELOPERS  
JAVA ENGINEER  
JAVA FRESHER  
JAVA FRESHERS  
JAVA FRESHERS REQUIRED  
JAVA FRONT END DEVELOPER  
JAVA FULL STACK DEVELOPER  
JAVA INTERNS  
JAVA J2EE DEVELOPER  
JAVA J2EE SOFTWARE DEVELOPER  
JAVA NMS - LEAD

JAVA NODE.JS DEVELOPER  
JAVA PORTAL SENIOR DEVELOPER  
JAVA PROFESSIONAL PROGRAMMER  
JAVA SCRIPT DEVELOPER  
JAVA SCRIPT DEVELOPER - ANGULAR JS/ REACT  
JAVA SOFTWARE ARCHITECT  
JAVA SOFTWARE DEVELOPER  
JAVA SPRING MVC DEVELOPER  
JAVA SQL DEVELOPER  
JAVA TECH LEAD  
JAVA TECHNICAL SUPPORT  
JAVA TRAINEE  
JAVA TRAINEE ENGINEER  
JAVA TRAINEE ENGINEERS  
JAVA TRAINER  
JAVA WEB APPLICATION DEVELOPER  
JAVA WITH TESTING  
JAVA/ J2EE DEVELOPER  
JAVA/ PYTHON BACKEND DEVELOPER  
JAVA/.NET DEVELOPER  
JAVA/ANDROID TRAINER  
JAVA/J2EE - TRAINEE SOFTWARE ENGINEERS  
JAVADEVELOPER  
JAVAJ2EE DEVELOPER  
JAVASCRIPT / MEAN STACK DEVELOPERS  
JAVASCRIPT CUM NODEJS DEVELOPER  
JAVASCRIPT DEVELOPER  
JAVASCRIPT HTML/CSS FRONT-END DEVELOPER  
JAVASCRIPTDEVELOPE  
JBOSS ENGINEER  
JD EDWARDS  
WORLDSOFT TECHNICAL  
Joomla DEVELOPER  
JR C++ DEVELOPERS  
JR DEVELOPER  
JR DEVELOPER .NET  
JR DEVELOPER-FRESHERS  
JR EMBEDDED ENGINEER  
JR JAVASCRIPT DEVELOPER

JR MANUAL TESTER  
JR PHP DEVELOPER  
JR PHP PROGRAMMER  
JR PHP TRAINEE  
JR PROGRAMMER  
JR SOFTWARE DEVELOPER  
JR SOFTWARE ENGINEER  
JR SOFTWARE ENGINEER - IOS/ANDROID PLATFORM  
JR. ANDROID DEVELOPER  
JR. AX DEVELOPER  
JR. JAVA HADOOP DEVELOPER  
JR. PHP DEVELOPER  
JR. PHP DEVELOPERS  
JR. PYTHON SOFTWARE ENGINEER  
JR. QA ENGINEER  
JR. SEO EXECUTIVE /PPC  
JR. SOFTWARE DEVELOPER  
JR. SOFTWARE ENGINEER  
JR. UNITY PROGRAMMER  
JR. WEB DEVELOPER  
JR.PROGRAMMER  
JR.SOFTWARE DEVELOPER  
JR.SOFTWARE ENGINEER  
JR.WEB DESIGNER  
JR.WEB DEVELOPER  
JR/SR .NET DEVELOPER  
JUNIOR INTERMEDIATE WEB DEVELOPER  
JUNIOR - WINDOWS SYSTEM ADMINISTRATOR  
JUNIOR .NET DEVELOPER  
JUNIOR .NET SOFTWARE DEVELOPER  
JUNIOR / SENIOR JAVA DEVELOPER  
JUNIOR ANALYST  
JUNIOR CAD ENGINEER  
JUNIOR CLOUD ENGINEER  
JUNIOR DATA SCIENTIST  
JUNIOR DATABASE ADMINISTRATOR  
JUNIOR DATABASE ENGINEER  
JUNIOR DESIGNER  
JUNIOR DEVELOPER  
JUNIOR DEVELOPERS  
JUNIOR DEVELOPMENT ENGINEER - SOFTWARE  
JUNIOR DOTNET DEVELOPERS.

JUNIOR DOTNET  
DEVOLPER  
JUNIOR ENGINEER  
JUNIOR ENGINEER -  
MANAGED IT SERVICES  
JUNIOR ENGINEERS  
JUNIOR EXECUTIVE  
OPERATIONS  
JUNIOR FRONT-END  
DEVELOPER  
JUNIOR IMPLEMENTATION  
ENGINEERS  
JUNIOR IOS DEVELOPER  
JUNIOR IT  
ADMINISTRATOR  
JUNIOR JAVA DEVELOPER  
JUNIOR NETWORK  
ENGINEER  
JUNIOR OPERATIONS  
EXECUTIVE  
JUNIOR PHP DEVELOPER  
JUNIOR PHP  
PROGRAMMER  
JUNIOR PROGRAMMER  
JUNIOR PROGRAMMER  
TRAINEE  
JUNIOR RD ENGINEER  
JUNIOR RESEARCH  
FELLOW  
JUNIOR SAP FICO  
CONSULTANT  
JUNIOR SOFTWARE  
DEVELOPER  
JUNIOR SOFTWARE  
ENGINEER  
JUNIOR SOFTWARE  
ENGINEER DEVELOPMENT  
JUNIOR SOFTWARE  
ENGINEER TRAINEE  
JUNIOR SOFTWARE  
ENGINEER TRAINEE -  
ANDROID  
JUNIOR SOFTWARE  
ENGINEER/ SYSTEM  
ADMINISTRATOR  
JUNIOR SOLUTIONS  
ENGINEER  
JUNIOR SQL SERVER  
DEVELOPER  
JUNIOR SYSTEM  
ENGINEER  
JUNIOR SYSTEMS  
ENGINEER TRAINEE  
JUNIOR TEST ENGINEER  
JUNIOR UI DESIGNER

JUNIOR WEB DESIGNER  
JUNIOR WEB DEVELOPER  
JUNIOR WEB  
DEVELOPERS  
JUNIOR. SOFTWARE  
ENGINEER PHP  
JUNIOR.SOFTWARE  
ENGINEER PHP  
DEVELOPER  
JUNIOUR DOT NET  
DEVELOPER  
L1 SUPPORT ENGINEER  
L1 SUPPORT ENGINEERS  
L1/L2 SUPPORT ENGINEER  
L2  
APPLICATION/PRODUCT  
SUPPORT ENGINEER  
L2 TECHNICAL SUPPORT  
ENGINEER  
LABVIEW DEVELOPER  
LAMP STACK DEVELOPER  
LARAVEL / PHP TEAM  
LEAD  
LARAVEL AND CORE PHP  
DEVELOPER  
LARAVEL DEVELOPER  
LARAVEL DEVELOPERS  
LARAVEL NODE JS  
DEVELOPER  
LARAVEL PHP  
DEVELOPER  
LEAD AUTOMATION  
ENGINEER  
LEAD CLOUD ADMIN  
LEAD PHP DEVELOPER  
LEAD SOFTWARE  
DEVELOPER  
LEVEL 7 â TECHNICAL  
SPECIALIST / ARCHITECT  
LINUX UBUNTU  
PROFESSIONALS  
LINUX - SOFTWARE  
ENGINEER  
LINUX ADMIN  
LINUX ADMIN L2  
LINUX ADMINISTRATOR  
LINUX DEVELOPER WITH 1  
YEAR EXPERIENCE  
LINUX SERVER  
ADMINISTRATOR  
LINUX SYSTEM  
ADMINISTRATOR  
MACHINE LEARNING  
MACHINE LEARNING-  
DEVELOPER

MAGENTO  
MAGENTO BACK-END  
DEVELOPER  
MAGENTO DEVELOPER  
MAGENTO DEVELOPER  
PROGRAMMER  
MAGENTO DEVELOPERS  
MAGENTO DEVELOPOER  
MAGENTO FRONT END  
DEVELOPER.  
MAGENTO/ PHP  
DEVELOPERS  
MAGENTO/SR. MAGENTO  
DEVELOPER  
MAGNETO DEVELOPER  
MAINFRAME DEVELOPER  
MAINFRAME  
PROFESSIONALS  
MAINFRAME SOFTWARE  
DEVELOPER  
MAINFRAMES DEVELOPER  
MANUAL SOFTWARE  
TESTER  
MANUAL TESTER  
MATLAB DEVELOPER  
MBA EXECUTIVE  
MCA INTERSHIP  
PROGRAMME  
MEAN STACK DEVELOPER  
MEAN STACK  
DEVELOPERS  
MEAN STACK DEVOPER  
MEDIA TRAINEE  
MERN STACK DEVELOPER  
MICROSOFT AZURE  
SOLUTION DEVELOPER  
MICROSOFT DYNAMICS  
NAV  
MICROSOFT SHAREPOINT  
DEVELOPER  
MID LEVEL PHP  
DEVELOPER  
MID-LEVEL ASP.NET MVC  
DEVELOPER  
MMGRAPHICS DEV  
MOBILE TESTING  
APPLICATION  
MS SQL  
MULTIMEDIA TEST  
INTEGRATION ENGINEER  
MVC .NET DEVELOPER  
MVC DEVELOPER  
MY SQL DEVELOPER  
MYSQL DATABASE  
ADMINISTRATOR

NEED EXPERT HTML  
CODER  
NET DEVELOPER  
NET SOFTWARE  
ENGINEER  
NETSUITE DEVELOPER  
NETWORK BACKEND  
ENGINEERS  
NETWORK SUPPORT  
ENGINEER  
NETWORK/SERVER  
ENGINEER - TRAINEE  
NETWORKING ENGINEER  
NODE JS DEVELOPER  
NODE JS SENIOR  
DEVELOPER  
NODE.JS DEVELOPER -  
PUG JADE  
NODE.JS FULL STACK  
DEVELOPER  
NODEJS DEVELOPER  
NODEJS TRAINEE  
NS2 DEVELOPER  
ODOO DEVELOPER  
ONLINE BUSINESS  
DEVELOPER  
OPENINGS FOR PHP  
DEVELOPERS  
OPENSTACK ENGINEER  
OR ANALYST  
ORACLE  
ORACLE APEX  
DEVELOPER  
ORACLE APPS DBA  
ORACLE APPS DBA  
CONSULTANT  
ORACLE APPS DBA-IT  
SUPPORT  
ORACLE BRM  
ORACLE CPQ  
ORACLE DATABASE  
ADMINISTRATOR .  
ORACLE DBA  
ORACLE DEVELOPER  
ORACLE EBS TECHNICAL  
DEVELOPER  
ORACLE FINANCE  
CONSULTANT  
ORACLE PLACEMENT  
TRAINEE OFFER  
PATENT ENGINEER  
PEGA DEVELOPER  
PEOPLESOFT FINANCIALS  
DEVELOPER  
PERFORMANCE TEST  
ENGINEER

PERL DEVELOPER  
PHONEGAP DEVELOPER  
PHP  
PHP DEVELOPER  
PHP DIGITAL MARKETING  
EXPERT  
PHP JAVA DEVELOPER  
PHP WORDPRESS  
DEVELOPER  
PHP - SOFTWARE  
DEVELOPER  
PHP - TRAINEE  
PHP - WORDPRESS  
DEVELOPER  
PHP / DRUPAL  
DEVELOPER  
PHP / FRONT END  
DEVELOPER  
PHP / LARAVEL  
DEVELOPER  
PHP / MYSQL WEB  
DEVELOPER  
PHP AND ANJULARJS  
DEVELOPER  
PHP AND MAGENTO  
DEVELOPER  
PHP AND WORDPRESS  
TRAINEE  
PHP APPLICATION  
DEVELOPER  
PHP ASSOCIATES  
PHP CODEIGNITER  
DEVELOPER  
PHP DEVELOPER  
PHP DEVELOPER CODE  
IGNITER  
PHP DEVELOPER  
(CAKEPHP /CODEIGNTER )  
PHP DEVELOPER - CAKE  
PHP/LARAVEL  
PHP DEVELOPER -  
FRESHER  
PHP DEVELOPER / CODE  
IGNITER  
PHP DEVELOPER AND  
WEB DESIGNER  
PHP DEVELOPER EXPERT  
PHP DEVELOPER FOR  
INFOPARK COMPANY  
PHP DEVELOPER  
FRESHER  
PHP DEVELOPER  
LARAVEL  
PHP DEVELOPER TRAINEE  
PHP DEVELOPER TRAINEE  
/ CORE TRAINEE

PHP DEVELOPER WITH  
EXPERIENCE IN PHPUNIT  
TESTING  
PHP DEVELOPER-TRAINEE  
PHP DEVELOPER.  
PHP DEVELOPERS  
PHP DEVELOPMENT  
PHP DOT NET DEVELOPER  
PHP ENGINEER  
PHP FRESHER  
PHP FULL STACK  
DEVELOPER  
PHP INTERN  
PHP JAVASCRIPT  
DEVELOPER  
PHP LARAVEL  
DEVELOPER  
PHP LARAVEL  
DEVELOPERS  
PHP LARAVEL SOFTWARE  
DEVELOPER  
PHP LEAD  
PHP MYSQL  
PROGRAMMER  
PHP NET DEVELOPERS  
PHP POGRAMER  
PHP PORGRAMMER  
PHP PROFESSIONALS  
PHP PROGRAMMER  
PHP PROGRAMMER -  
WORDPRESS  
PHP PROGRAMMERS  
PHP SENIOR DEVELOPER  
PHP SOFTWARE  
DEVELOPER  
PHP TEAM LEAD  
PHP TRAINED FRESHERS  
PHP TRAINEE  
PHP TRAINEE (FRESHERS)  
PHP TRAINEE / JUNIOR  
PROGRAMMER  
PHP TRAINEE/DEVELOPER  
PHP TRAINER  
PHP WEB DEVELOPER  
PHP WEB DEVELOPER  
CUM LARAVEL SYPHONY  
PHP WEB DEVELOPERS  
PHP WITH ANGULAR.JS  
DEVELOPER  
PHP WORDPRESS  
DEVELOPER  
PHP-CODEIGNITER  
PHP-CODEIGNITER  
DEVELOPER  
PHP-LARAVEL  
DEVELOPER

PHP-WORDPRESS  
DEVELOPER  
PHP/ JAVASCRIPT  
DEVELOPER  
PHP/ WORDPRESS  
DEVELOPER  
PHP/CODEIGNITER  
DEVELOPER  
PHP/Framework  
DEVELOPER  
PHP/MAGENTO  
DEVELOPER  
PHP/SR. PHP DEVELOPER  
PHP/WEB DEVELOPER  
PHP/WORDPRESS  
DEVELOPER  
PHP/WORDPRESS  
DEVELOPER  
PHPDEVELOPER  
PHYSICAL DESIGN  
TRAINEE/ENGINEER  
PL SQL DEVELOPER  
PLSQL DEVELOPER  
PMO BUSINESS  
OPERATION  
PPC EXECUTIVE  
PRESTASHOP  
DEVELOPER  
PROCESS AND PRODUCT  
QUALITY ASSURANCE  
PRODUCT ASSOCIATE  
PRODUCT CONSULTANT/  
DEVELOPER TRAINEE  
PRODUCT DESIGNER  
UI/UX  
PRODUCT DEVELOPER  
PRODUCT ENGINEER  
PRODUCT MANAGER  
PRODUCT SUPPORT  
ENGINEER  
PRODUCT SUPPORT  
EXECUTIVE  
PRODUCTION SPECIALIST  
PRODUCTION SUPPORT  
ENGINEER  
PRODUCTION SUPPORT  
ENGINEER  
PROFESSIONAL SERVICES  
CONSULTANT  
PROFESSIONAL WEB  
DEVELOPER  
PROGRAM MANAGEMENT  
ANALYST  
PROGRAMMER

PROGRAMMER / SR.  
PROGRAMMER  
PROGRAMMER ANALYST  
PROGRAMMER ANALYST  
TRAINEE  
PROGRAMMER FOR VB6.0  
PROGRAMMER/TRAINEE  
(PROGRAMMING)  
PROGRAMMING  
PROGRAMMING ANALYST  
PROJECT ANALYST  
PROJECT ASSOCIATE  
PROJECT CO-ORDINATOR  
PROJECT DELIVERY  
EXECUTIVE  
PROJECT LEAD (PHP)  
PROJECT LEAD .NET  
PROJECT LEAD MANAGER  
COGNOS  
PROJECT MANAGER  
PROJECT MANAGER/TEAM  
LEADER  
PROJECT TRAINEE  
PYTHON / DJANGO  
DEVELOPER  
PYTHON DEVELOPER  
PYTHON DEVELOPER  
TRAINEE  
PYTHON DEVELOPERS  
PYTHON DEVELOPMENT  
LEAD  
PYTHON DJANGO  
DEVELOPER  
PYTHON WEB DEVELOPER  
QA TEST ENGINEER  
QA ANALYST  
QA ENGINEER  
QA EXECUTIVE  
QA INTERN  
QA SELENIUM  
AUTOMATION ENGINEER  
QA SOFTWARE TEST  
ENGINEER  
QA TESTER  
QA TRAINEE  
QC ENGINEER  
QLIKVIEW DEVELOPER  
QUALITY ANALYST  
QUALITY ANALYST -  
TRAINEE  
QUALITY ANALYST  
SOFTWARE TESTING  
QUALITY ANALYST  
TRAINEE

QUALITY ASSURANCE  
ENGINEER  
QUALITY TESTER  
RD ENGINEER  
RD INTERN  
RD JUNIOR ENGINEER  
STORAGE  
REACT JS  
REACT JS DEVELOPER  
REACT NATIVE  
DEVELOPER  
REACT NATIVE  
DEVELOPERS  
REACT-NODE JS  
DEVELOPER  
REACT.JS-SOFTWARE  
DEVELOPER  
REACTNATIVE  
DEVELOPER  
REDHAT ADMINISTRATOR  
RESEARCH ANALYST  
RESEARCH ENGINEER  
RESEARCH ENGINEER  
TRAINEE  
RESEARCH SPECIALIST  
RF WIRELESS ENGINEER  
ROBOTICS ENGINEER  
ROR DEVELOPER  
ROR SOFTWARE  
DEVELOPER  
RUBY BACK-END  
DEVELOPER  
RUBY ON RAILS  
RUBY ON RAILS  
DEVELOPER  
RUBY/RAILS DEVELOPER  
SALES MANAGER  
SALESFORCE CERTIFIED  
DEVELOPER  
SALESFORCE DEVELOPER  
SALESFORCEDEVELOPER  
SAP ABAP CONSULTANT  
SAP ABAP DEVELOPER  
SAP ABAP TECHNICAL  
DEVELOPER  
SAP ASSOCIATE  
SOFTWARE ENGINEER  
SAP B1 FUNCTIONAL  
SAP BASIS CONSULTANT  
SAP BI ANALYST  
SAP CONSULTANT  
SAP HANA DEVELOPER  
SAP HCM CONSULTANT  
SAP SOLUTION ANALYST

SAP TESTING  
CONSULTANT  
SAP TRAINEE/ JR SAP  
CONSULTANT  
SAS ANALYST  
SCALA / JAVA DEVELOPER  
SCALA SYSTEMS  
ARCHITECT  
SCM ENGINEER  
SCRUM MASTER  
SEARCH ENGINE  
DEVELOPER  
SEARCH ENGINE  
MARKETING (SEM)  
ANALYST - (ACCOUNT  
MANAGER)  
SEARCH ENGINE  
OPTIMISATION  
SEARCH ENGINE  
OPTIMIZATION(SEO)  
EXPERT  
SEARCH ENGINE  
OPTIMIZER  
SECURITY ANALYST  
ASP.NET  
SELENIUM TESTER  
SENIOR .NET DEVELOPER  
SENIOR .NET SOFTWARE  
ENGINEER  
SENIOR .NET TEAM  
LEADER  
SENIOR ANALYST-  
MICROSOFT DYNAMICS  
CRM  
SENIOR ANDROID  
DEVELOPER  
SENIOR APPLICATION  
ENGINEER  
SENIOR ASP .NET  
DEVELOPER  
SENIOR ASP.NET WEB  
DEVELOPER  
SENIOR AWS MIGRATION  
SENIOR DEVELOPER  
SENIOR DEVOPS  
ENGINEER  
SENIOR DOT NET  
DEVELOPER  
SENIOR DOTNET  
DEVELOPER  
SENIOR FRONT END  
DEVELOPER  
SENIOR FRONT-END  
APPLICATION ENGINEER  
SENIOR FULL STACK  
DEVELOPER

SENIOR GRAPHIC  
DESIGNER  
SENIOR HADOOP  
ENGINEER  
SENIOR HTML5  
PROGRAMMER  
SENIOR IOS DEVELOPER  
SENIOR JAVA DEVELOPER  
SENIOR JAVA DEVELOPER  
SENIOR JAVA FULL STACK  
DEVELOPER  
SENIOR JAVA  
PROGRAMMER BIG DATA/  
HADOOP  
SENIOR JAVA WEB  
DEVELOPER  
SENIOR JAVASCRIPT  
DEVELOPER  
SENIOR LEAD PHP  
DEVELOPER  
SENIOR LINUX SERVER  
ADMINISTRATOR  
SENIOR MAGENTO  
DEVELOPER  
SENIOR MVC DEVELOPER  
SENIOR NET DEVELOPER  
SENIOR PHP  
SENIOR PHP DEVELOPER  
SENIOR PHP DEVELOPER  
SENIOR PHP DEVELOPER -  
TEAM LEADER  
SENIOR PHP DEVELOPER /  
PHP LEAD  
SENIOR PHP  
DEVELOPMENT HEAD  
SENIOR  
PROGRAMMAR/PROGRAM  
MAR  
SENIOR PYTHON  
DEVELOPER  
SENIOR QA ENGINEER  
SENIOR SOFTWARE  
DEVELOPER  
SENIOR SOFTWARE  
DEVELOPER ENGINEER  
SENIOR SOFTWARE  
DEVELOPERS  
SENIOR SOFTWARE  
ENGINEER  
SENIOR SOFTWARE  
ENGINEER - UI  
SENIOR SOFTWARE PHP  
DEVELOPER  
SENIOR SYSTEMADMIN  
SENIOR TEST ENGINEER  
SENIOR TESTER

SENIOR UI DEVELOPER  
SENIOR UI DEVELOPER/UI  
DESIGNER  
SENIOR UIUX HTML  
DEVELOPER  
SENIOR WEB / UI  
DEVELOPER  
SENIOR WEB DESIGNER  
SENIOR WEB DEVELOPER  
SENIOR WEB DEVELOPER  
( ANGULAR JS )  
SENIOR WORDPRESS  
DEVELOPER  
SENIOR.NET DEVELOPER  
ENGINEER  
ENGINEER  
SEO  
SEO / DIGITAL MARKETING  
MANAGER  
SEO ANALYST  
SEO AND WORDPCESS  
DEVELOPER  
SEO DEVELOPER  
SEO EXECUTIVE  
SEO TRAINEE  
SERVER NETWORK  
ADMINISTRATOR TRAINEE  
SERVER ADMIN  
SERVICE DELIVERY  
ENGINEER  
SERVICE DESK -  
L1SUPPORT  
SERVICE ENGINEER  
TRAINEE  
SHARE POINT LEVEL II  
SHAREPOINT DEVELOPER  
SHAREPOINT SUPPORT  
CONSULTANT  
SHOPIFY DEVELOPER  
SOFTWARE DEVELOPER  
SOFTWARE DEVELOPER  
SOFTWARE INTERN  
SOFTWARE TESTER  
SOFTWARE ANALYSIS  
SOFTWARE ANALYST  
SOFTWARE ANALYST ERP  
SOFTWARE AND  
HARDWARE JOB  
SOFTWARE APPLICATION  
DATABASE TECHNICAL  
SUPPORT EXECUTIVE  
SOFTWARE ASSOCIATE  
SOFTWARE ASSOCIATES  
SOFTWARE BUSINESS  
ANALYST

SOFTWARE DESIGN  
ENGINEER  
SOFTWARE DESIGNER  
SOFTWARE DEVELOPER  
SOFTWARE DEVELOPER  
.NET PROGRAMMER  
SOFTWARE DEVELOPER  
CLOUD  
SOFTWARE DEVELOPER  
RELIANCE JIO-PRODUCT  
DEVELOPMENT  
SOFTWARE DEVELOPER ( PHP)  
SOFTWARE DEVELOPER  
(JAVA)  
SOFTWARE DEVELOPER -  
AI  
SOFTWARE DEVELOPER -  
ASP/.NET/VB/C  
SOFTWARE DEVELOPER -  
C  
SOFTWARE DEVELOPER -  
DATA ANALYTICS  
SOFTWARE DEVELOPER -  
DOT NET  
SOFTWARE DEVELOPER -  
EMBEDDED  
DEVELOPMENT  
SOFTWARE DEVELOPER -  
FRESHER  
SOFTWARE DEVELOPER -  
JAVA CONSULTANT  
SOFTWARE DEVELOPER -  
JS  
SOFTWARE DEVELOPER -  
NETWORKING  
SOFTWARE DEVELOPER  
.NET  
SOFTWARE DEVELOPER /  
.NET  
SOFTWARE DEVELOPER  
/PROGRAMMER  
SOFTWARE DEVELOPER  
ASP.NET  
SOFTWARE DEVELOPER  
BOT  
SOFTWARE DEVELOPER C  
SPECIALIST  
SOFTWARE DEVELOPER  
FRESHER  
SOFTWARE DEVELOPER  
FRESHERS  
SOFTWARE DEVELOPER  
LEAD

SOFTWARE DEVELOPER  
PHP/WORDPRESS  
SOFTWARE DEVELOPER  
TRAINEE  
SOFTWARE DEVELOPER  
TRAINEE - 2016 BATCH  
SOFTWARE DEVELOPER-  
VB  
SOFTWARE DEVELOPER-  
ASSOCIATE  
SOFTWARE DEVELOPER-  
PHP  
SOFTWARE DEVELOPER/  
TESTER  
SOFTWARE  
DEVELOPER/PROGRAMME  
R  
SOFTWARE  
DEVELOPER/TESTING  
SOFTWARE  
DEVELOPER/WORDPRESS  
DEVELOPER  
SOFTWARE DEVELOPERS  
SOFTWARE DEVELOPERS  
FRESHERS 2017 PASS  
OUTS  
SOFTWARE  
DEVELOPMENT  
SOFTWARE  
DEVELOPMENT .NET  
SOFTWARE  
DEVELOPMENT ENGINEER  
SOFTWARE  
DEVELOPMENT  
ENGINEERS  
SOFTWARE  
DEVELOPMENT  
ENGINEERTECHNICAL  
ANALYST  
SOFTWARE  
DEVELOPMENT  
INTERNSHIP  
SOFTWARE  
DEVELOPMENT TRAINEE  
SOFTWARE  
DEVELOPMENT/ TESTING  
SOFTWARE DEVELOPER  
SOFTWARE DRUPAL  
DEVELOPER  
SOFTWARE ENGG  
SOFTWARE ENGINEER  
SOFTWARE ENGINEER  
DEVELOPER  
SOFTWARE ENGINEER  
TRAINER

SOFTWARE ENGINEER  
(JAVA/J2EE/WEB  
TECHNOLOGIES)  
SOFTWARE ENGINEER (UI  
DEVELOPER)  
SOFTWARE ENGINEER  
(WORDPRESS)  
SOFTWARE ENGINEER -  
.NET  
SOFTWARE ENGINEER -  
.NET TECHNOLOGIES  
SOFTWARE ENGINEER -  
2016 BATCH  
SOFTWARE ENGINEER -  
2017 BATCH  
SOFTWARE ENGINEER -  
ASP.NET DEVELOPER  
SOFTWARE ENGINEER -  
BACK END DEVELOPER  
SOFTWARE ENGINEER -  
BACKEND  
SOFTWARE ENGINEER -  
C/C++ AND WEB  
DEVELOPMENT  
SOFTWARE ENGINEER -  
DATABASE DEVELOPER  
SOFTWARE ENGINEER -  
DEVELOPER  
SOFTWARE ENGINEER -  
DEVELOPERS  
SOFTWARE ENGINEER -  
DOT NET DEVELOPER  
SOFTWARE ENGINEER -  
FRESHER  
SOFTWARE ENGINEER -  
FRONT END DEVELOPER  
SOFTWARE ENGINEER -  
FRONTEND  
SOFTWARE ENGINEER -  
IMPLEMENTATION  
SOFTWARE ENGINEER -  
JAVA  
SOFTWARE ENGINEER -  
MACHINE LEARNING  
SOFTWARE ENGINEER -  
PHP  
SOFTWARE ENGINEER -  
TESTING  
SOFTWARE ENGINEER -  
TRAINEE  
SOFTWARE ENGINEER -  
WEB DEVELOPER  
SOFTWARE ENGINEER -  
WEB DEVELOPMENT

SOFTWARE ENGINEER -  
QA TESTING  
SOFTWARE ENGINEER -  
TRAINEE  
SOFTWARE ENGINEER -  
TRAINEES  
SOFTWARE ENGINEER  
.NET DEVELOPER  
SOFTWARE ENGINEER /  
DEVELOPER  
SOFTWARE ENGINEER  
ANGULAR 2.0  
SOFTWARE ENGINEER  
ASSOCIATE  
SOFTWARE ENGINEER  
AUTOMATION TESTING  
AND QA  
SOFTWARE ENGINEER  
DEVELOPER .NET  
SOFTWARE ENGINEER  
FRESHER  
SOFTWARE ENGINEER  
FULL STACK WEB  
DEVELOPER  
SOFTWARE ENGINEER  
INTERN  
SOFTWARE ENGINEER  
INTERNSHIP  
SOFTWARE ENGINEER IOS  
SOFTWARE ENGINEER  
JAVA  
SOFTWARE ENGINEER  
LINUX UNIX SCRIPTING  
SOFTWARE ENGINEER  
NET DEVELOPER  
SOFTWARE ENGINEER  
TESTING  
SOFTWARE ENGINEER  
TRAINEE  
SOFTWARE ENGINEER  
TRAINEE (DEVELOPMENT)  
SOFTWARE ENGINEER  
TRAINEE - JAVA  
SOFTWARE ENGINEER  
â□□ DEVELOPERS  
SOFTWARE ENGINEER  
â□□ TRAINEE / QUALITY  
ASSURANCE ENGINEER -  
TRAINEE  
SOFTWARE ENGINEER- C  
SOFTWARE ENGINEER-  
DEVELOPER / QA  
SOFTWARE ENGINEER-  
DEVELOPER / QA -  
TESTING

SOFTWARE ENGINEER-  
TRAINEE  
SOFTWARE ENGINEER-  
DEVELOPER  
SOFTWARE ENGINEER-  
TRAINEE  
SOFTWARE ENGINEER-  
TRAINEEPHP-  
JHOOMLA/WORDPRESS  
SOFTWARE  
ENGINEERDOT NET  
DEVELOPER  
SOFTWARE ENGINEERING  
SOFTWARE ENGINEERS  
SOFTWARE ENGINEER  
SOFTWARE FUNCTIONAL  
ANALYST  
SOFTWARE  
IMPLEMENTATION  
ENGINEER  
SOFTWARE INTERN  
SOFTWARE INTERNS  
SOFTWARE INTERNSHIP  
SOFTWARE IOS  
DEVELOPER  
SOFTWARE LEAD  
SOFTWARE MANUAL  
TESTER  
SOFTWARE NETWORK  
ADMINISTRATOR  
SOFTWARE OPERATING  
EXECUTIVE  
SOFTWARE OPERATION  
ENGINEER  
SOFTWARE PRODUCT  
DEVELOPER  
SOFTWARE PRODUCT QA  
SOFTWARE  
PROGRAMMER  
SOFTWARE  
PROGRAMMER OR  
DEVELOPER  
SOFTWARE  
PROGRAMMER TRAINEE  
SOFTWARE  
PROGRAMMER TRAINEES  
SOFTWARE  
PROGRAMMERS  
SOFTWARE QA ANALYST  
SOFTWARE QUALITY  
ASSURANCE  
SOFTWARE RESEARCH  
ANALYST  
SOFTWARE SALES  
ENGINEER

SOFTWARE SALES  
EXECUTIVE  
SOFTWARE SPECIALIST  
SOFTWARE SUPPORT  
ANALYST  
SOFTWARE SUPPORT  
ENGINEERS  
SOFTWARE SUPPORT  
EXECUTIVE  
SOFTWARE TECHNICAL  
SUPPORT ENGINEER  
SOFTWARE TEST  
ENGINEE  
SOFTWARE TEST  
ENGINEER  
SOFTWARE TEST  
ENGINEER TRAINEE  
SOFTWARE TEST  
ENGINEERS  
SOFTWARE TESTER  
SOFTWARE TESTER -  
QUALITY ASSURANCE  
SOFTWARE TESTER  
TRAINEE  
SOFTWARE TESTER  
TRAINER  
SOFTWARE TESTER, WEB  
DEVELOPER AND  
ANDROID DEVELOPER  
SOFTWARE TESTER-  
AUTOMATION  
SOFTWARE TESTER/QA  
SOFTWARE TESTING  
SOFTWARE TESTING -  
MANUAL  
SOFTWARE TESTING AND  
DEVELOPMENT  
SOFTWARE TESTING  
AUTOMATION  
SOFTWARE TESTING CUM  
SUPPORT EXECUTIVE  
SOFTWARE TESTING  
ENGINEER  
SOFTWARE TESTING  
ENGINEER/INTERN  
SOFTWARE TESTING  
TRAINEE  
SOFTWARE TESTING  
TRAINEE EMBEDDED  
SOFTWARE TESTING  
TRAINER  
SOFTWARE TESTING.  
SOFTWARE TRAINEE  
SOFTWARE TRAINEE  
NODE JS / DRUPAL

SOFTWARE TRAINEE -  
2016 BATCH  
SOFTWARE TRAINEE -  
2017 BATCH  
SOFTWARE TRAINEE  
AUTOMATION TEST  
ENGINEER  
SOFTWARE TRAINEE  
DEVELOPER  
SOFTWARE TRAINEE  
ENGINEER  
SOFTWARE TRAINEE  
ENGINEER PHP  
SOFTWARE TRAINEE  
ENGINEER  
SOFTWARE TRANIEE  
ENGINEER  
SOFTWARE WEB AND  
WINFORMS DEVELOPER  
SOFTWARE/ MCA INTERNS  
SOFTWARE/IT-TRAINEE  
SOFTWAREDEVELOPER  
SOFTWAREENGINEER  
SOLUTION CONSULTANT  
SOTWARE ENGINEER  
TRAINEE  
SQA ENGINEER  
SQL DATABASE  
ADMINISTRATOR  
SQL DBA PROFESSIONAL  
SQL DEVELOPER  
SQL DEVELOPER TRAINEE  
SQL QUERY WRITER  
(MYSQL)  
SQL SERVER DATABASE  
ADMINISTRATOR  
SQL SERVER DBA  
SQL SERVER SENIOR  
DEVELOPER  
SR ANDROID DEVELOPER  
SR ASPNET DEVELOPER  
SR AWS AMAZON WEB  
SERVICES  
SR DEVELOPER  
SR DEVELOPER - .NET  
SR DEVELOPER - ASP NET  
SR DEVELOPER  
SALESFORCE  
SR DEVELOPER/TEAM  
LEAD - PHP -  
CODEIGNITER/ZEND/  
CAKE PHP  
SR DOT DEVELOPER  
SR HTML DEVELOPER  
SR JAVA DEVELOPER

SR JAVA DEVELOPER  
JAVA DEVELOPER  
SR MAGENTO  
PROGRAMMER  
SR NET DEVELOPER  
SR ODOO OPENERP  
DEVELOPER  
SR PHP DEVELOPER  
SR PHP/PHP DEVELOPER  
SR PHPDEVELOPER  
SR PROGRAMMER  
ANALYST  
SR REPRESENTATIVE -  
BUSINESS OPERATIONS  
SR SEO STRATEGIST  
SR SOFTWARE  
DEVELOPER  
SR SOFTWARE ENGINEER  
SR WEB DESIGNER  
SR WEB DEVELOPER  
SR. .NET DEVELOPER  
SR. ANDROID  
APPLICATION DEVELOPER  
SR. ANDROID DEVELOPER  
SR. ASP.NET DEVELOPER  
SR. AUGMENTED VIRTUAL  
REALITY ENGINEER  
SR. DRUPAL DEVELOPER  
SR. HTML DEVELOPER  
SR. HTML PROGRAMMER  
SR. IOS DEVELOPER  
SR. JAVA CONSULTANT  
SR. JAVA DEVELOPER  
SR. JAVA  
DEVELOPER/LEAD  
SR. JAVA/J2EE  
DEVELOPER  
SR. LARAVEL DEVELOPER  
SR. MAGENTO  
DEVELOPER  
SR. MVC DEVELOPER  
SR. NET DEVELOPER  
SR. NET/ ASP.NET  
DEVELOPER  
SR. PHP DEVELOPER  
SR. PHP MVC DEVELOPER  
SR. PHP/ PHP DEVELOPER  
SR. SOFTWARE  
DEVELOPER  
SR. SOFTWARE  
DEVELOPER PHP  
SR. SOFTWARE ENGINEER  
SR. SOFTWARE ENGINEER  
- JEE TECHNOLOGIES

SR. SOFTWARE  
PROGRAMMER  
SR. UI DEVELOPER  
SR. UI/UX DESIGNER/  
LEAD  
SR. WEB DESIGNER  
SR. WEB DEVELOPER  
SR. WEB DEVELOPER PHP  
SR. WEBSITE DESIGNER  
SR. WORDPRESS  
DEVELOPER  
SR.DEVELOPER  
SR.DOTNET DEVELOPER  
SR.EMBEDDED SYSTEM  
TESTER  
SR.INTEGRATION  
ENGINEER  
SR.IOS DEVELOPER  
SR.IOS DEVELOPERS  
SR.JAVA DEVELOPER  
SR.JAVA SCRIPT  
DEVELOPER  
SR.LARAVEL DEVELOPER  
SR.PHP DEVELOPER  
SR.PHP DEVELOPER-  
LARAVEL  
SR.SOFTWARE  
DEVELOPER  
SR.SOFTWARE ENGINEER  
SR.WEB CONSULTANT  
SR.WEB DEVELOPER  
SR.WEB PHP DEVELOPER  
SR.WORDPRESS  
DEVELOPER  
SRETL DEVELOPER  
SRJAVA UI DEVELOPER  
STE - SOFTWARE TEST  
ENGINEER  
STORAGE SUPPORT  
ENGINEER HITACHI  
STORAGE ADMIN  
SUBTITLING - EDITORâ□□  
SUPPLY CHAIN IT  
CONSULTANT  
SUPPORT AGENT  
SUPPORT ANALYST  
SUPPORT SOFTWARE  
ENGINEER  
SURVEY PROGRAMMER  
SYSTEM ADMIN CUM ERP  
COORDINATOR  
SYSTEM ADMINISTRATOR  
SYSTEM ADMINISTRATOR  
LINUX

SYSTEM ADMINISTRATORS  
SYSTEM ANALYST  
SYSTEM ANALYST  
TRAINEE FRESHERS  
SYSTEM AND NETWORK ADMINISTRATOR  
SYSTEM DEVELOPER  
SYSTEM ENGINEER  
SYSTEM ENGINEER  
TRAINEE  
SYSTEM SOFTWARE ENGINEER TRAINEE  
SYSTEMS ANALYST DATA ANALYST TRAINEE  
SYSTEMS DEVELOPER  
SYSTEMS ENGINEER  
SYSTEMS ENGINEER - LINUX / WINDOWS  
TABLEAU DEVELOPER  
TEAM LEAD  
TEAM LEAD - PHP  
TEAM LEAD DOT NET  
TEAM LEAD- PHP DEVELOPMENT  
TEAM LEAD/MODULE LEAD (PHP)  
TEAM LEADER  
TEAM LEADER - OPERATIONS  
TECH LEAD JAVA  
TECH LEAD- DOT NET  
TECH LEAD-ANDROID DEVELOPER  
TECH SUPPORT ANALYST  
TECHNICAL ANALYST  
TECHNICAL ASSOCIATE  
TECHNICAL CONSULTANT  
TECHNICAL CRM PROGRAMMER  
TECHNICAL ENGINEER  
TECHNICAL ENGINEER SERVICE  
TECHNICAL ENGINEER SERVICE / BO ENGINEER  
TECHNICAL FULL STACK DEVELOPER  
TECHNICAL LEAD  
TECHNICAL LEAD - JAVA  
TECHNICAL LEAD - ORACLE ATG COMMERCE PLATFORM  
TECHNICAL LEAD- DOT NET ARCH  
TECHNICAL LEAD- JAVA API

TECHNICAL LEAD- UI DEVELOPER  
TECHNICAL LEADER - JAVA  
TECHNICAL OFFICER  
TECHNICAL STAFF  
TECHNICAL SUPPORT ANALYST  
TECHNICAL SUPPORT ENGINEER  
TECHNICAL SUPPORT ENGINEER L1  
TECHNICAL SUPPORT ENGINEER I  
TECHNICAL SUPPORT EXECUTIVE / DESIGNER  
TECHNICAL SUPPORT SPECIALIST  
TECHNICAL TEAM LEADER- PHP  
TECHNICAL TRAINEE MICROSOFT  
TECHNICAL TRAINERS TECHNOLOGY CONSULTANT  
TEST ANALYST  
TEST ASSOCIATE ENGINEER  
TEST ASSOCIATES  
TEST ENGINEER  
TEST ENGINEER WITH STRONG SELENIUM KNOWLEDGE  
TEST LEAD  
TESTING  
TESTING SOFTWARE SUPPORT ENGINEER  
TESTING ENGINEER  
TESTING ENGINEER - SELENIUM TOOL BASED  
TESTING ENGINEER - TRAINEE  
TESTING IMPLEMENTATION ENGINEER  
TESTING TRAINEE  
TESTING/NETWORKING ENGINEER-TRAINEE  
THE SYSTEM INTEGRATION ANALYST  
THREE .JS DEVELOPER  
TR.PHP DEVELOPER  
TRAINEE  
TRAINEE SOFTWARE PROGRAMMER

TRAINEE - SOFTWARE DEVELOPER  
TRAINEE - SOFTWARE ENGINEER  
TRAINEE - SOFTWARE TESTING  
TRAINEE - WEB DEVELOPER  
TRAINEE -ANALYTICS  
TRAINEE .NET DEVELOPER  
TRAINEE CONSULTANT  
TRAINEE DATA ANALYST  
TRAINEE DEVELOPER  
TRAINEE DEVELOPERS  
TRAINEE DEVELOPERS VISUAL BASIC 6  
TRAINEE EMBEDDED ENGINEER  
TRAINEE ENGINEER  
TRAINEE ENGINEER  
PRODUCTION SUPPORT  
TRAINEE ENGINEER - CLOUD  
TRAINEE ENGINEER - DEVELOPERS  
TRAINEE ENGINEER - WEBSITE MONITORING  
TRAINEE ENGINEER-TESTING  
TRAINEE ENGINEERS  
TRAINEE GAME DEVELOPER  
TRAINEE GTAC ENGINEER  
TRAINEE IAM ENGINEER  
TRAINEE JAVA DEVELOPER  
TRAINEE JAVA WEBSERVICES  
TRAINEE LIDAR/ PHOTOGRAMMETRY ENGINEER  
TRAINEE MAGENTO DEVELOPER  
TRAINEE ORACLE DEVELOPER  
TRAINEE PHP DEVELOPER  
TRAINEE PRODUCT ENGINEER  
TRAINEE PROGRAMMER  
TRAINEE PROGRAMMER / PROGRAMMER  
TRAINEE PROGRAMMER/ DEVELOPER  
TRAINEE QA - TESTING  
TRAINEE QA ENGINEERS

TRAINEE QUALITY ANALYST  
TRAINEE SOFTWARE CONSULTANTS  
TRAINEE SOFTWARE DEVELOPER  
TRAINEE SOFTWARE DEVELOPER - ERP  
TRAINEE SOFTWARE DEVELOPER - WEB UI  
TRAINEE SOFTWARE DEVELOPERS  
TRAINEE SOFTWARE DEVELOPMENT  
TRAINEE SOFTWARE ENGINEER  
TRAINEE SOFTWARE ENGINEER(JAVA)  
TRAINEE SOFTWARE ENGINEER, TRAINEE QUALITY ANALYST, BUSINESS ANALYST  
TRAINEE SOFTWARE ENGINEERS  
TRAINEE SOFTWARE PROFESSIONAL  
TRAINEE SOFTWARE PROGRAMMER - JAVA  
TRAINEE SOFTWARE SAP  
TRAINEE SOFTWARE TESTER  
TRAINEE SUPPORT ENGINEER  
TRAINEE SYSTEMS ENGINEER - SYSTEM ADMINISTRATION DIVISION  
TRAINEE TEST ENGINEER  
TRAINEE TEST ENGINEER-PERFORMANCE MONITORING  
TRAINEE TEST ENGINEERS  
TRAINEE WEB DEVELOPER  
TRAINEE WINDOWS DEVELOPER  
TRAINEE SOFTWARE ENGINEER  
TRAINEE-SOFTWARE ENGINEER  
TRAINEE-SOFTWARE ENGINEERS

TRAINEE/JR. SOFTWARE ENGINEER  
TRAINEES SOFTWARE TESTING  
TRAINER CUM JAVA DEVELOPER  
TRAINER CUM PHP DEVELOPER  
TRAINER CUM WEB DEVELOPER  
TRAINER FOR SOFTWARE TESTING  
UI ANALYST  
UI DESIGNER  
UI DESIGNER DEVELOPER  
UI DESIGNERS  
UI DEVELOPER  
UI DEVELOPER AND DESIGNER  
UI DEVELOPER/ PHP DEVELOPER  
UI DEVELOPER/FRONT END DEVELOPER (HTML)  
UI DEVELOPER/WEB DEVELOPER/USER INTERFACE DEVELOPER  
UI DEVELOPERS  
UI INTERN  
UI JAVASCRIPT  
UI UX DESIGNER  
UI- FRONT END DEVELOPER  
UI/ UX DESIGNER  
UI/FRONT END DEVELOPERS  
UI/UX  
UI/UX DESIGNER  
UI/UX DESIGNER  
REQUIRED  
UI/UX DEVELOPER  
UI/WEB - DEVELOPER DESIGNER  
UIUX DESIGNER  
UNITY 3D DEVELOPER  
UNITY 3D GAME DEVELOPER  
UNITY GAME DEVELOPER  
UNITY3D DEVELOPER  
UNITY3D GAME DEVELOPER  
UNIX ADMINISTRATOR  
URGENT OPENING FOR PHP WEB DEVELOPER

URGENT REQUIREMENT FOR .NET FRESHERS/EXPERIENCE  
US BENCH SALES RECRUITERS  
US IT BENCH SALES RECRUITER  
US IT RECRUITER  
USER INTERFACE DESIGNER  
USER INTERFACE DEVELOPER  
UX DESIGNER  
UX DEVELOPER  
UX/UI DESIGNERS  
VB .NET DEVELOPER  
VB DOT NET DEVELOPER  
VB.NET  
VB.NET DEVELOPER  
VB.NET DEVELOPERS  
VB.NET PROGRAMMER  
VB.NET WEB PROGRAMMERS  
VBA  
VBA DEVELOPER  
VC PROFESSIONALS  
VIDEO GAME ANALYST & DATA COLLECTION SPECIALIST  
VISUAL BASIC.NET DEVELOPER  
VISUAL CUM GRAPHIC DESIGNER  
VISUAL ENGINEER  
VISUALIZATION SOFTWARE ENGINEER  
VLSI ENGINEER  
VLSI TRAINER  
VSTO DEVELOPER  
WALK-IN FOR ENTRY LEVEL PROGRAMMER  
WANTED PHP DEVELOPER FOR US BASED IT COMPANY  
WEB ANDROID DEVELOPER  
WEB GRAPHIC DESIGNER  
WEB / BACKEND DEVELOPER  
WEB / UI DESIGNER  
WEB AND MARKET DEVELOPER  
WEB APPLICATION DEVELOPER

WEB APPLICATIONS  
DEVELOPER  
WEB CONSULTANT  
WEB CONSULTANTS  
WEB CONTENT  
DEVELOPER  
WEB CUM GRAPHIC  
DESIGNER  
WEB DATA ANALYST  
WEB DESIGNER  
WEB DESIGNER  
DEVELOPER  
WEB DESIGNER HTML  
DESIGNER  
WEB DESIGNER &  
DEVELOPER  
WEB DESIGNER / UI  
DEVELOPER  
WEB DESIGNER AND  
DEVELOPER  
WEB DESIGNER CUM  
DEVELOPER  
WEB DESIGNER  
DEVELOPER  
WEB DESIGNER TRAINEE  
WEB DESIGNER UI / UX  
WEB DESIGNER WITH  
WORD PRESS  
KNOWLEDGE  
WEB DESIGNER/  
GRAPHICS DESIGNER  
TRAINEE  
WEB  
DESIGNER/DEVELOPER  
WEB DESIGNER/FRONT-  
END DEVELOPER  
WEB DESIGNERS  
WEB DESIGNING  
WEB DESIGNER  
WEB DEVELOPER  
WEB DEVELOPER PHP  
WEB DEVELOPER  
SECURITY  
WEB DEVELOPER  
TRAINEE  
WEB DEVELOPER - FRONT  
END  
WEB DEVELOPER -  
PHP/MAGENTO/WORDPRE  
SS  
WEB DEVELOPER /  
HYBRID MOBILE APP  
WEB DEVELOPER / PHP  
DEVELOPER

WEB DEVELOPER AND UI  
DESIGNER  
WEB DEVELOPER CUM  
DESIGNER  
WEB DEVELOPER  
CUSTOMIZED ERP  
PROJECT  
WEB DEVELOPER  
DESIGNER  
WEB DEVELOPER  
HTML/JAVASCRIPT  
WEB DEVELOPER PHP  
OPENCART WORDPRESS  
WEB DEVELOPER  
PHP/JAVASCRIPT  
WEB DEVELOPER  
TRAINEE  
WEB DEVELOPER  
WORDPRESS/MAGENTO  
DEVELOPER  
WEB DEVELOPER-TEAM  
LEAD  
WEB DEVELOPER/  
SOFTWARE  
DEVELOPMENT (INTERN)  
WEB  
DEVELOPER/PROGRAMME  
R  
WEB  
DEVELOPER/PROGRAMME  
R (PHP)  
WEB DEVELOPERS  
WEB DEVELOPMENT  
WEB DEVELOPMENT  
INTERN  
WEB FORM DESIGN AND  
WEB APPLICATION  
DEVELOPMENT  
WEB FRONT END  
DEVELOPER  
WEB MOBILE  
APPLICATION DEVELOPER  
WEB RESEARCH  
EXECUTIVE  
WEB SITE DEVELOPMENT  
WEB SUPPORT &  
DESIGNING  
WEB UI DESIGNERS  
WEB UI DEVELOPER  
WEB UI/UX DEVELOPER  
WEB UX/UI DEVELOPMENT  
DESIGNER  
WEB-APP DEVELOPER  
WEB-APPLICATION  
DEVELOPER  
WEB/GRAPHIC DESIGNER

WEB/PHP DEVELOPER  
WEBDESIGNER  
WEBDEVELOPER  
WEBSITE COORDINATOR  
WEBSITE DESIGN AND  
DEVELOPMENT  
WEBSITE DESIGNER  
WEBSITE DESIGNER  
HTML5  
WEBSITE DESIGNER  
TRAINEE  
WEBSITE DEVELOPER  
WEBSITE MAINTENANCE  
SOFTWARE TESTER  
WEBSITE UI/UX DESIGNER  
AND DEVELOPER  
WINDOW SYSTEM  
ADMINISTRATOR  
WINDOWS  
ADMINISTRATOR  
WINDOWS DEVELOPER  
WINDOWS DEVELOPER  
C.NET  
WINDOWS SYSTEM  
ADMINISTRATOR  
WODPRESS DEVELOPER  
WORD PRESS  
DEVELOPER  
WORD PRESS EXPERT  
WORDPRESS  
WORDPRESS / PHP  
DEVELOPER  
WORDPRESS /PHP  
DEVELOPER  
WORDPRESS AND  
DRUPAL DEVELOPER  
WORDPRESS AND PHP  
DEVELOPER  
WORDPRESS DESIGNER  
WORDPRESS DESIGNER  
AND DEVELOPER  
WORDPRESS DEVELOPER  
WORDPRESS DEVELOPER  
WITH PHP  
WORDPRESS TRAINEE  
(FRESHERS)  
WORDPRESS WEB  
DESIGNER  
WORDPRESS/PHP  
DEVELOPER  
WORDPRESSPHP  
DEVELOPER  
XAMARIN SR. SOFTWARE  
ENGINEER  
XML ANALYST  
XML ANALYST/OPERATOR

XML DEVELOPER  
XML DEVELOPER TRAINEE  
XML OPERATORS  
XML PROGRAMMAR  
XML PROGRAMMER  
XML TRAINEE  
XML/EPUB PROGRAMMER  
XML/HTML DEVELOPER  
YOUNG GRADUATE  
TRAINEE  
ZEND DEVELOPER

**MOBILE DEVELOPER**

ANDROID IOS  
DEVELOPER  
ANDROID & IOS  
DEVELOPER  
ANDROID AND IOS  
APPLICATION  
DEVELOPERS  
ANDROID AND IOS  
DEVELOPER  
ANDROID AND IOS  
FRESHERS  
ANDROID AND WEB  
DEVELOPER  
ANDROID APP  
DEVELOPER  
ANDROID APPLICATION  
DEVELOPER  
ANDROID APPLICATION  
INTERNS  
ANDROID APPLICATION  
SECURITY ANALYST  
ANDROID DEVELOPER  
ANDROID DEVELOPER  
FRESHERS  
ANDROID DEVELOPER  
TRAINEE  
ANDROID DEVELOPER /  
IOS DEVELOPER  
ANDROID DEVELOPER  
CUM TRAINER  
ANDROID DEVELOPER IIT  
/IIN  
ANDROID DEVELOPER/SR.  
DEVELOPER  
ANDROID DEVELOPERS  
ANDROID INTERNS  
ANDROID IOS DEVELOPER  
ANDROID MOBILE APP  
DEVELOPER  
ANDROID MOBILE  
APPLICATION DEVELOPER

ANDROID MOBILE  
APPLICATION  
DEVELOPMENT  
ANDROID MOBILE  
DEVELOPER  
ANDROID PROGRAMMER /  
ANDROID DEVELOPER  
ANDROID SOFTWARE  
DEVELOPER  
ANDROID SOFTWARE  
ENGINEER / DEVELOPER  
ANDROID TRAINEE  
ANDROID TRAINER  
ANDROID UNITY  
DEVELOPER  
ANDROID/IOS DEVELOPER  
APP MARKETING  
EXECUTIVE  
ASSOCIATE ANDROID  
DEVELOPER  
ASSOCIATE CONSULTANT  
TECHNOLOGY  
BACKEND DEVELOPER  
â PHP / MVC  
FRAMEWORK  
CIVIL SITE ENGINEER  
CORE PHP WITH  
CODEIGNITER.  
DEVELOPER ANDROID  
APPS APPLICATION  
DEVELOPER ANDROID  
APPS / APPLICATION  
DEVELOPERS  
DEVELOPMENT ENGINEER  
MOBILE APPLICATIONS  
DEVELOPMENT ENGINEER  
- MOBILE APPLICATIONS  
DOT NET  
DOT NET APPLICATION  
DEVELOPER  
EMBEDDED ANDROID  
DEVELOPER  
ENGINEER - ANDROID  
APPLICATION  
DEVELOPMENT  
FRESHER KONY MOBILE  
APP  
FRONT END ANGULARJS  
DEVELOPER  
GRAPHICS DESIGNER  
HYBRID MOBILE APP  
DEVELOPER  
HYBRID MOBILE  
APPLICATION DEVELOPER

HYBRID MOBILE APPS  
DEVELOPER  
HYBRID MOBILE  
DEVELOPER  
IONIC / HYBRID  
DEVELOPER  
IONIC / PHONEGAP  
DEVELOPER  
IOS APP DEVELOPER  
IOS APPLICATION  
DEVELOPER  
IOS APPLICATION  
DEVELOPER TRAINEE  
IOS APPS DEVELOPER  
TRAINEE  
IOS DEVELOPER  
IOS FRESHER  
IOS FRESHERS  
IOS MOBILE APP  
DEVELOPER  
IOS SOFTWARE ENGINEER  
/ DEVELOPER  
IOS TRAINEE  
IOS/ ANDROID  
DEVELOPER  
IOS/ANDROID DEVELOPER  
IOS/IPHONE DEVELOPER  
IPHONE APP DEVELOPER  
IPHONE DEVELOPER  
JAVA SOFTWARE  
ENGINEERS  
JAVA UI DEVELOPER  
JAVASCRIPT AND HTML5  
MOBILE DEVELOPER  
JR. ENGINEER PYTHON  
JUNIOR ANDROID  
DEVELOPER  
JUNIOR SOFTWARE  
ENGINEER - IPHONE -  
ANDROID  
JUNIOR UNITY 3D  
DEVELOPER  
MOBILE APP DESIGNER  
MOBILE APP DEVELOPER  
MOBILE APP  
DEVELOPMENT  
MOBILE APPLICATION -  
DEVELOPER  
MOBILE APPLICATION  
DEVELOPER  
MOBILE APPLICATION  
DEVELOPER /  
PROGRAMMER HYBRID  
MOBILE APPS DEVELOPER

MOBILE APPS DEVELOPER  
BLOCKCHAIN  
MOBILE APPS MANAGER  
MOBILE DEVELOPER  
MOBILE DEVELOPER -  
TRAINEE  
MOBILE DEVELOPMENT -  
ANDROID  
MOBILE DEVELOPMENT -  
IOS  
MOBILE FRONT END  
DEVELOPER  
MOBILE GAME  
DEVELOPER  
MOBILE NATIVE  
DEVELOPER  
MOBILE SOFTWARE  
DEVELOPER  
MOBILE SOFTWARE  
DEVELOPER IOS ANDROID  
MOBILE SOFTWARE  
ENGINEER  
MOBILE TEST ENGINEER  
NATIVE ANDROID  
DEVELOPER  
ONLINE TUTOR OLT  
PHONEGAP/CORDOVA  
DEVELOPER  
PHP WEB DEVELOPER  
WEB DESGINER  
PRESALES SOLUTIONS  
MANAGER  
PROCESS DEVELOPER  
PROJECT LEADER  
PYTHON AND WEB  
DEVELOPER  
QUANTITATIVE  
DEVELOPER/ANALYST  
REACT MOBILE  
DEVELOPER  
REQUIRED IOS / IPHONE  
DEVELOPERS  
RESPONSIVE DESIGNER  
SENIOR 2D GAME ARTIST  
SENIOR ANDROID  
APPLICATION DEVELOPER  
SENIOR APPLICATION UI  
DEVELOPER  
SENIOR UNITY 3D  
DEVELOPER  
SENIOR WEB  
APPLICATIONS  
DEVELOPER  
SHARE POINT DEVELOPER

SMARTPHONE  
APPLICATION DEVELOPER  
SOFTWARE DEVELOPER -  
ANDROID  
SOFTWARE DEVELOPER  
WEB AND MOBILE PHONE  
PROGRAMMING  
SOFTWARE ENGINEER -  
ANDROID DEVELOPER  
SOFTWARE ENGINEER -  
IOS / ANDROID  
SOFTWARE QUALITY  
ANALYST  
SR IOS DEVELOPER  
SR. IPHONE / IOS  
DEVELOPER  
SR. IPHONE APP  
DEVELOPER  
SR. MAGENTO  
DEVELOPERS  
SR. UI WEB DESIGNER  
SR.ANDROID DEVELOPER  
SR.ANDROID  
DEVELOPERS  
SR.IOS DEVELOPER/LEAD  
TECH LEAD  
TESTER WEB APP MOBILE  
APP  
TRAINER CUM ANDROID  
DEVELOPER  
TRAINER CUM IOS  
DEVELOPER  
UI / UX DESIGNER WEB  
MOBILE APP  
UI DVELOPER  
UI UX DEVELOPER  
UNITY DEVELOPER  
WEB MOBILE APP  
DEVELOPER  
WEB DEVELOPER / APP  
DEVELOPER  
WEB-ANDROID  
DEVELOPER  
WINDOWS APP  
DEVELOPER  
WINDOWS MOBILE  
DEVELOPER  
XAMARIN DEVELOPERS  
XAMARIN DEVELOPER  
  
**HARDWARE ENGINEER**  
ANALYST TRAINEE  
ASSOCIATE TECHNICAL  
ENGINEER  
ASSOCIATE TRAINEE  
ENGINEER

ASSOCIATE TRAINEE  
NETWORKING ENGINEER  
AVAYA ENGINEER  
CCNA ENGINEER  
CCTV NETWORK  
ENGINEER  
CISCO VOICE ENGINEER  
CLOUD DEPLOYMENT  
ENGINEER  
COMPUTER AND CCTV  
TECHNICIAN  
COMPUTER HARDWARE  
NETWORK ENGINEER  
COMPUTER HARDWARE &  
NETWORK ENGINEER  
COMPUTER HARDWARE  
ENGINEER  
COMPUTER HARDWARE  
NETWORK ENGINEER  
CONFIGURATION  
MANAGEMENT ENGINEER  
DATAPATH  
DESKTOP AND  
NETWORKING ENGINEER  
DESKTOP ENGINEERS  
DESKTOP NETWORK  
SUPPORT  
DESKTOP SUPORT L1  
ENGINEER.  
DESKTOP SUPPORT  
DESKTOP SUPPORT ENGG  
DESKTOP SUPPORT  
ENGINEER  
DESKTOP SUPPORT L 2  
ENGINEER  
DESKTOP/NETWORK  
ENGINEER  
ELECTRONIC SYSTEMS  
DESIGN ENGINEER  
EMBEDDED ENGINEER  
EMBEDDED HARDWARE  
EMBEDDED HARDWARE  
ENGINEER  
ENGINEER NETWORK  
FIELD ENGINEER  
FIELD SERVICE ENGINEER  
FIELD SERVICE ENGINEER  
TRAINEE  
FIRMWARE DEVELOPER  
GLOBAL NOC ENGINEER  
H/W NETWORKING  
FACULTY  
HARDWARE  
NETWORKING ENGINEER

HARDWARE & EMBEDDED  
SYSTEMS DESIGN  
ENGINEER  
HARDWARE & NETWORK  
TECHNICIAN  
HARDWARE &  
NETWORKING ENGINEER  
HARDWARE / SYSTEM  
ENGINEER  
HARDWARE AND  
DESKTOP SUPPORT  
ENGINEER  
HARDWARE AND  
NETWORK ENGINEER  
HARDWARE AND  
NETWORKING ENGINEER  
HARDWARE AND  
NETWORKING  
TECHNICIAN  
HARDWARE ASSISTANT  
HARDWARE ENGINEER  
HARDWARE NETWORK  
AND LINUX ENGINEER  
HARDWARE NETWORK  
ENGINEER  
HARDWARE NETWORKING  
SYSTEM ENGINEER  
HARDWARE NETWORKING  
- SYSTEM ENGINEER  
HARDWARE NETWORKING  
ENGINEER  
HARDWARE NETWORKING  
TRAINER/FACULTY  
HARDWARE PRODUCTION  
ENGINEER  
HARDWARE NETWORKING  
ENGINEER  
HELPDESK ENGINEER  
HP HARDWARE ENGINEER  
IMPLEMENTATION AND  
SUPPORT ENGINEER  
INSTALLATION ENGINEER  
IP WIFI ENGINEER  
IS EXECUTIVE  
IT HARDWARE AND  
NETWORK ENGINEER  
IT NETWORKING  
ENGINEER  
IT SUPPORT  
IT TECH SUPPORT  
ENGINEER  
IT TECHNICIAN  
JR SYSTEM  
ADMINISTRATOR

JUNIOR ENGINEER  
HARDWARE  
NETWORKING  
JUNIOR IT HARDWARE  
NETWORKING ENGINEER  
JUNIOR IT HARDWARE  
NETWORKING ENGINEER  
JUNIOR SYSTEM  
ADMINISTRATOR  
LAPTOP REPAIR  
TECHNICIAN  
LAPTOP TECHNICIAN  
LINUX SYSTEM  
ADMINISTRATORS  
MOBILE TECHNICIAN  
MONITORING SERVICE  
PERSONNEL  
MOTHERBOARD REPAIR  
ENGINEER  
NET WORKING ENGINEER  
NETWORK HARDWARE  
ENGINEER  
NETWORK MANAGEMENT  
NETWORK & HARDWARE  
ENGINEER  
NETWORK ADMIN  
NETWORK ANALYST  
NETWORK ENGINEER  
NETWORK ENGINEER -  
LEVEL I  
NETWORK ENGINEER -  
TECH SUPPORT  
NETWORK ENGINEER  
TRAINEE  
NETWORK ENGINEERS  
NETWORK FIELD  
ENGINEER  
NETWORK TEST  
ENGINEER  
NETWORK/HARDWARE  
TRAINER  
NETWORK/SYSTEMS  
ENGINEER  
NETWORKING SUPPORT  
ENGINEER  
NETWORKING  
DEVELOPER  
NETWORKING FIELD  
ENGINEERS  
ONSITE WIFI ENGINEER  
OSS SPECIALIST  
PHP DEVELOPER  
TRAINEE  
PRINTER ENGINEER

PROJECT TRAINEE  
ENGINEER  
REMOTE SUPPORTS  
RF ENGINEER  
RNO/RAN ENGINEER  
SENIOR EMBEDDED  
HARDWARE ENGINEER  
SENIOR LINUX  
ADMINISTRATOR  
SENIOR SYSTEM ADMIN  
SERVICE ENGINEER  
SERVICE ENGINEERS IN  
HARD  
SOFTWARE INSTALLATION  
AND SUPPORT ENGINEER  
SOLAR AUTOCAD  
DESIGNER  
SR SYSTEM  
ADMINISTRATOR  
SUPPORT ENGINEER  
SYSTEM NETWORK  
ADMINISTRATOR  
SYSTEM ADMIN  
SYSTEM ADMINISTER  
SYSTEM ADMINISTRATOR  
LINUX  
SYSTEM ADMINISTRATOR  
TRAINEE  
SYSTEM ENGINEER /  
TECHNICAL SUPPORT  
ENGINEER  
SYSTEM TECHNICIAN  
SYSTEM NETWORK  
ADMINISTRATOR  
TECHNICAL SUPPORT  
EXECUTIVE  
TECHNICIAN-  
NETWORKING  
TELECOM ENGINEER  
TELECOM  
ENGINEER/TECHNICIAN  
TRAINEE - SERVICE  
ENGINEER  
TRAINEE NETWORK  
ENGINEER  
TRAINEE SYSTEM  
ADMINISTRATOR  
TRAINEE SYSTEM  
ENGINEER  
TRAINEE TECHNICAL  
SUPPORT EXECUTIVE  
VARIOUS DESIGNATION  
FOR MANAGEMENT AND  
TECHNICAL DEPTT.  
VERIFICARION ENGINEER

VM-SYSTEM  
ADMINISTRATORS  
(INTERN)  
VR HARDWARE ENGINEER  
WIFI IP NETWORK EXPERT  
WINDOW SERVER  
ADMINISTRATOR  
WINDOWS ENGINEER  
WIRELESS NETWORK  
ENGINEER

## APPENDIX 2: RESULTS OF MODELS M1 AND M2

In Table A2 we present the results of models M1 and M2 with two-way interaction terms.

In Model 1 of Table A2, where our sample is limited to female applicants, the two-way interaction term *Low Net Income* and *Post-March 1, 2017* is significant and negative suggesting that women were less likely to be invited for interviews after the law at less profitable companies, relative to more profitable companies. As we note earlier, this could be because more profitable and less profitable companies have different economic conditions, so that women applying to less profitable companies would have trended differently from women applying to more profitable companies, regardless of the legislation.

In Model 2 of Table A2, our sample is limited to companies with low profitability (i.e., where *Low Net Income* = 1). The two-way interaction term *Female* and *Post-March 1, 2017* is positive but is not significant, the direction of the coefficient suggests that among less profitable companies, women were more likely to be invited for interviews after the legislation. As we note earlier, this result could be because female applicants trended differently from male applicants (due to, for example, greater push towards inclusion, change in the supply of female candidates), regardless of the legislation.

**TABLE A2: RESULTS OF MODELS CORRESPONDING TO EQUATIONS M1 AND M2**

|                                       | DV: Invited for Interview |                          |
|---------------------------------------|---------------------------|--------------------------|
|                                       | Female Subsample          | Low Net Income Subsample |
|                                       | (1)                       | (2)                      |
| Female x Post-March 1, 2017=1         |                           | 0.0015<br>(0.0020)       |
| Low Net Income=1                      | 0.0189***<br>(0.0035)     |                          |
| Low Net Income x Post-March 1, 2017=1 | -0.0204***<br>(0.0069)    |                          |
| nApplicationsTMaleJobRole             | -0.0000***<br>(0.0000)    | 0.0000<br>(0.0000)       |
| nApplicationsTFemaleJobRole           | 0.0000***<br>(0.0000)     | 0.0000<br>(0.0000)       |
| nApplicantsTMaleJobRole               | 0.0000<br>(0.0000)        | 0.0000<br>(0.0000)       |
| nApplicantsTFemaleJobRole             | -0.0000<br>(0.0000)       | -0.0000<br>(0.0000)      |
| nJobPostTJobRole                      | -0.0000<br>(0.0000)       | -0.0000*<br>(0.0000)     |
| CompanyNJobT                          | -0.0286***<br>(0.0012)    | 0.0032***<br>(0.0008)    |
| CompanyNApplicationsT                 | -0.0000***<br>(0.0000)    | 0.0000***<br>(0.0000)    |
| 2.Application Type                    | -0.0691<br>(0.0473)       | -0.1531***<br>(0.0202)   |
| 3.Application Type                    | -0.0791*<br>(0.0473)      | -0.1557***<br>(0.0202)   |
| 4.Application Type                    | 0.2865***<br>(0.1001)     | -0.1744***<br>(0.0282)   |
| Constant                              | 0.2725***<br>(0.0520)     | 0.1671***<br>(0.0224)    |
| Applicant fixed effects               | Yes                       | Yes                      |
| Job post fixed effects                | Yes                       | Yes                      |
| Company fixed effects                 | Yes                       | Yes                      |
| Period fixed effects                  | Yes                       | Yes                      |
| Observations                          | 444,963                   | 240,842                  |
| R-squared                             | 0.437                     | 0.441                    |

Notes: The table evaluates the effect of the maternity leave act on receipt of an invitation to interview. Reference group for Application Type is 'information unavailable.' Robust standard errors are shown in parentheses; p-values correspond to two-tailed tests. \*\*\* p<0.01, \*\* p<0.05, \* p<0.1

**APPENDIX 3**  
**TABLE A3: INVITATIONS TO INTERVIEW POST LAW BY NET INCOME**  
**(CLUSTER-ROBUST STANDARD ERRORS)**

|                                                | DV: Invited for Interview                                    |
|------------------------------------------------|--------------------------------------------------------------|
|                                                | Cluster-Robust Errors (clustered on NetIncome (categorical)) |
| Low Net Income=1                               | 0.0101**<br>(0.0036)                                         |
| Low Net Income x Post-March 1, 2017=1          | -0.0123***<br>(0.0015)                                       |
| Female x Post-March 1, 2017=1                  | -0.0004<br>(0.0003)                                          |
| Low Net Income x Female=1                      | 0.0031***<br>(0.0007)                                        |
| Low Net Income x Female x Post-March 1, 2017=1 | -0.0054***<br>(0.0007)                                       |
| nApplicationsTMaleJobRole                      | -0.0000***<br>(0.0000)                                       |
| nApplicationsTFemaleJobRole                    | 0.0000**<br>(0.0000)                                         |
| nApplicantsTMaleJobRole                        | 0.0000<br>(0.0000)                                           |
| nApplicantsTFemaleJobRole                      | 0.0000**<br>(0.0000)                                         |
| nJobPostTJobRole                               | 0.0000<br>(0.0000)                                           |
| CompanyNJobT                                   | -0.0247***<br>(0.0017)                                       |
| CompanyNApplicationsT                          | -0.0000**<br>(0.0000)                                        |
| 2.Application Type                             | -0.1135***<br>(0.0039)                                       |
| 3.Application Type                             | -0.1237***<br>(0.0044)                                       |
| 4.Application Type                             | 0.2173***<br>(0.0066)                                        |
| Constant                                       | 0.2417***<br>(0.0027)                                        |
| Applicant fixed effects                        | Yes                                                          |
| Job post fixed effects                         | Yes                                                          |
| Company fixed effects                          | Yes                                                          |
| Period fixed effects                           | Yes                                                          |
| Observations                                   | 1,125,469                                                    |
| R-squared                                      | 0.421                                                        |

---

Notes: The table evaluates the effect of the maternity leave act on receipt of an invitation to interview. Estimates are from ordinary-least-squares regressions (linear probability models). The categorical net income variable used for clustering consists of six categories — net income below -2 SD, -2SD to 1 SD, 1 SD to mean, mean to +1 SD, 1SD to 2 SD, above 2 SD. \*\*\* p<0.01, \*\* p<0.05, \* p<0.1

#### **APPENDIX 4: MODELS PREDICTING BEING INVITED FOR AN INTERVIEW (FOR VARIOUS COMPANY SIZES, BASED ON THE NUMBER OF EMPLOYEES)**

Table 7 shows the model where we compare companies with up to 10 employees to the adjacent group i.e., those with 11 to 50 employees (rather than with companies with a larger number of employees) to limit our sample to relatively similar companies. In Table A4 we present models where we compare companies with up to 10 employees with larger companies i.e., those with up to 200, 500, 2,000, 5,000, 10,000 and over 10,000 employees in models 2, 3, 4, 5, 6. and 7, respectively. Model 1 in Table A4 is identical to Table 7 and has been included in Table A4 for readers' convenience.

*More than 10 Employees* is a binary variable that is set to 0 if the focal application is at a company with up to 10 employees. *More than 10 Employees* is set to 1 if the focal application is to a company that has 11 to 50, 11 to 200, 11 to 500, 11 to 2,000, 11 to 5,000, 11 to 10,000, and 11 to over 10,000 employees; these ranges are used in models 1, 2, 3, 4, 5, 6. and 7, respectively, as indicated by the column headers for the models.

The three-way interaction between *More than 10 Employees*, *Female*, and *Post-March 1, 2017* is negative and significant in models 1-6 of Table A4 (i.e., for companies with up to 10,000 employees), suggesting that companies of various sizes (up to 10,000 employees) are likely to discriminate against women after the law. We find that when we include the largest companies in the sample—those with more than 10,000 employees—the coefficient of the three-way interaction term is not significant (Table A4 Model 7). This could potentially be because companies with over 10,000 employees likely have i) the resources to provide for maternity leave (and may already have generous maternity leave benefits in place prior to the legislation) and/or ii) processes in place to reduce discrimination in hiring.



|                       |           |           |           |           |           |           |           |
|-----------------------|-----------|-----------|-----------|-----------|-----------|-----------|-----------|
| Company fixed effects | Yes       |
| Period fixed effects  | Yes       |
| Observations          | 1,093,286 | 2,160,946 | 2,336,185 | 2,653,661 | 2,814,941 | 3,041,042 | 3,532,621 |
| R-squared             | 0.506     | 0.433     | 0.431     | 0.406     | 0.428     | 0.413     | 0.389     |

Notes: The table evaluates the effect of the maternity leave legislation on receipt of an invitation to interview. The terms More than 10 Employees, Post-March 1, 2017, and Female are absorbed because we include job fixed effects, period fixed effects, and applicant fixed effects. Reference group for Application Type is 'information unavailable.' Estimates are from ordinary-least-squares regressions (linear probability models). Robust standard errors are shown in parentheses; p-values correspond to two-tailed tests. \*\*\* p<0.01, \*\* p<0.05, \* p<0.1

**APPENDIX 5**  
**TABLE A5: BALANCE TABLE FOR MATCHING ANALYSIS**

|                                                                             | Without matching     |                       |                      | With matching        |                       |                   |
|-----------------------------------------------------------------------------|----------------------|-----------------------|----------------------|----------------------|-----------------------|-------------------|
|                                                                             | 1 to 10<br>Employees | 11 to 50<br>Employees | Difference           | 1 to 10<br>Employees | 11 to 50<br>Employees | Difference        |
| Total Assets (ln)                                                           | 5.403<br>(3.344)     | 8.213<br>(3.576)      | 2.810***<br>(0.023)  | 3.905<br>(1.906)     | 3.900<br>(1.942)      | -0.005<br>(0.056) |
| Net Income (ihs)                                                            | 2.024<br>(5.324)     | 1.823<br>(7.328)      | -0.201***<br>(0.061) | 2.570<br>(0.000)     | 2.605<br>(0.000)      | 0.035<br>(0.000)  |
| n_bvdsectors==2 (Banking, Insurance & Financial Services)                   | 0.013<br>(0.115)     | 0.011<br>(0.105)      | -0.002***<br>(0.000) | 0.011<br>(0.105)     | 0.011<br>(0.105)      | -0.000<br>(0.000) |
| n_bvdsectors==3 (Biotechnology and Life Sciences)                           | 0.006<br>(0.077)     | 0.001<br>(0.032)      | -0.005***<br>(0.000) | 0.001<br>(0.031)     | 0.001<br>(0.031)      | -0.000<br>(0.000) |
| n_bvdsectors==4 (Business Services)                                         | 0.517<br>(0.500)     | 0.459<br>(0.498)      | -0.058***<br>(0.001) | 0.505<br>(0.500)     | 0.505<br>(0.500)      | -0.000<br>(0.001) |
| n_bvdsectors==5 (Chemicals, Petroleum, Rubber & Plastic)                    | 0.006<br>(0.078)     | 0.003<br>(0.058)      | -0.003***<br>(0.000) | 0.003<br>(0.055)     | 0.003<br>(0.055)      | -0.000<br>(0.000) |
| n_bvdsectors==6 (Communications)                                            | 0.011<br>(0.103)     | 0.008<br>(0.090)      | -0.003***<br>(0.000) | 0.007<br>(0.083)     | 0.007<br>(0.083)      | 0.000<br>(0.000)  |
| n_bvdsectors==7 (Computer Hardware)                                         | 0.003<br>(0.051)     | 0.001<br>(0.027)      | -0.002***<br>(0.000) | 0.001<br>(0.025)     | 0.001<br>(0.025)      | -0.000<br>(0.000) |
| n_bvdsectors==8 (Computer Software)                                         | 0.215<br>(0.411)     | 0.316<br>(0.465)      | 0.101***<br>(0.001)  | 0.299<br>(0.458)     | 0.299<br>(0.458)      | 0.000<br>(0.001)  |
| n_bvdsectors==9 (Construction)                                              | 0.008<br>(0.089)     | 0.018<br>(0.133)      | 0.010***<br>(0.000)  | 0.013<br>(0.115)     | 0.013<br>(0.115)      | 0.000<br>(0.000)  |
| n_bvdsectors==10 (Food & Tobacco Manufacturing)                             | 0.000<br>(0.000)     | 0.028<br>(0.166)      | 0.028***<br>(0.000)  | 0.000<br>(0.000)     | 0.000<br>(0.000)      | 0.000<br>(0.000)  |
| n_bvdsectors==11 (Industrial, Electric & Electronic Machinery)              | 0.031<br>(0.174)     | 0.017<br>(0.131)      | -0.014***<br>(0.000) | 0.020<br>(0.138)     | 0.020<br>(0.138)      | 0.000<br>(0.000)  |
| n_bvdsectors==12 (Leather, Stone, Clay & Glass products)                    | 0.001<br>(0.037)     | 0.001<br>(0.023)      | -0.001***<br>(0.000) | 0.000<br>(0.000)     | 0.000<br>(0.000)      | 0.000<br>(0.000)  |
| n_bvdsectors==13 (Media & Broadcasting)                                     | 0.017<br>(0.128)     | 0.013<br>(0.115)      | -0.003***<br>(0.000) | 0.013<br>(0.113)     | 0.013<br>(0.113)      | 0.000<br>(0.000)  |
| n_bvdsectors==14 (Metals & Metal Products)                                  | 0.007<br>(0.083)     | 0.002<br>(0.041)      | -0.005***<br>(0.000) | 0.001<br>(0.033)     | 0.001<br>(0.033)      | -0.000<br>(0.000) |
| n_bvdsectors==15 (Mining & Extraction)                                      | 0.001<br>(0.029)     | 0.002<br>(0.045)      | 0.001***<br>(0.000)  | 0.000<br>(0.009)     | 0.000<br>(0.009)      | 0.000<br>(0.000)  |
| n_bvdsectors==16 (Miscellaneous Manufacturing)                              | 0.004<br>(0.059)     | 0.004<br>(0.064)      | 0.001***<br>(0.000)  | 0.004<br>(0.062)     | 0.004<br>(0.062)      | 0.000<br>(0.000)  |
| n_bvdsectors==17 (Printing & Publishing)                                    | 0.002<br>(0.042)     | 0.005<br>(0.070)      | 0.003***<br>(0.000)  | 0.006<br>(0.080)     | 0.006<br>(0.080)      | -0.000<br>(0.000) |
| n_bvdsectors==18 (Property Services)                                        | 0.006<br>(0.080)     | 0.004<br>(0.061)      | -0.003***<br>(0.000) | 0.004<br>(0.066)     | 0.004<br>(0.066)      | -0.000<br>(0.000) |
| n_bvdsectors==19 (Public Administration, Education, Health Social Services) | 0.023<br>(0.149)     | 0.022<br>(0.148)      | -0.000<br>(0.000)    | 0.028<br>(0.166)     | 0.028<br>(0.166)      | -0.000<br>(0.000) |
| n_bvdsectors==20 (Retail)                                                   | 0.020<br>(0.140)     | 0.026<br>(0.158)      | 0.005***<br>(0.000)  | 0.025<br>(0.155)     | 0.025<br>(0.155)      | -0.000<br>(0.000) |
| n_bvdsectors==21 (Textiles & Clothing Manufacturing)                        | 0.011<br>(0.105)     | 0.001<br>(0.032)      | -0.010***<br>(0.000) | 0.001<br>(0.023)     | 0.001<br>(0.023)      | -0.000<br>(0.000) |
| n_bvdsectors==22 (Transport Manufacturing)                                  | 0.003<br>(0.057)     | 0.005<br>(0.068)      | 0.001***<br>(0.000)  | 0.005<br>(0.074)     | 0.005<br>(0.074)      | 0.000<br>(0.000)  |
| n_bvdsectors==23 (Transport, Freight & Storage)                             | 0.012<br>(0.109)     | 0.005<br>(0.073)      | -0.007***<br>(0.000) | 0.005<br>(0.069)     | 0.005<br>(0.069)      | -0.000<br>(0.000) |
| n_bvdsectors==24 (Travel, Personal & Leisure)                               | 0.032<br>(0.175)     | 0.031<br>(0.172)      | -0.001**<br>(0.000)  | 0.034<br>(0.182)     | 0.034<br>(0.182)      | -0.000<br>(0.000) |
| n_bvdsectors==25 (Utilities)                                                | 0.001<br>(0.035)     | 0.000<br>(0.014)      | -0.001***<br>(0.000) | 0.000<br>(0.016)     | 0.000<br>(0.016)      | 0.000<br>(0.000)  |
| n_bvdsectors==26 (Wholesale)                                                | 0.042<br>(0.200)     | 0.013<br>(0.111)      | -0.029***<br>(0.000) | 0.013<br>(0.112)     | 0.013<br>(0.112)      | 0.000<br>(0.000)  |
| n_bvdsectors==27 (Wood, Furniture & Paper Manufacturing)                    | 0.002<br>(0.043)     | 0.001<br>(0.025)      | -0.001***<br>(0.000) | 0.000<br>(0.006)     | 0.000<br>(0.006)      | 0.000<br>(0.000)  |
| India_HQ==0                                                                 | 0.271<br>(0.444)     | 0.195<br>(0.396)      | -0.076***<br>(0.001) | 0.207<br>(0.405)     | 0.207<br>(0.405)      | 0.000<br>(0.001)  |
| India_HQ==1                                                                 | 0.557<br>(0.497)     | 0.679<br>(0.467)      | 0.122***<br>(0.001)  | 0.717<br>(0.451)     | 0.717<br>(0.451)      | -0.000<br>(0.001) |
| Observations                                                                | 328,149              | 947,436               | 1,275,585            | 301,950              | 778,803               | 1,080,753         |

**APPENDIX 6**

**TABLE A6: ANALYSIS OF HETEROGENEOUS EFFECTS IN THE PROBABILITY OF BEING INVITED FOR INTERVIEW IN THE PRE-LAW PERIOD BY GENDER AND NET INCOME**

|                                      | DV: Invited for interview |
|--------------------------------------|---------------------------|
| Net Income                           | -0.1698***                |
|                                      | (0.0613)                  |
| Female × Net Income                  | 0.0033                    |
|                                      | (0.0061)                  |
| Female × March 2016                  | -0.0062                   |
|                                      | (0.0052)                  |
| Female × April 2016                  | 0.0026                    |
|                                      | (0.0045)                  |
| Female × May 2016                    | -0.0037                   |
|                                      | (0.0052)                  |
| Female × June 2016                   | 0.0055                    |
|                                      | (0.0040)                  |
| Female × July 2016                   | 0.0006                    |
|                                      | (0.0040)                  |
| Female × August 2016                 | -0.0065                   |
|                                      | (0.0046)                  |
| Female × September 2016              | -0.0036                   |
|                                      | (0.0043)                  |
| Female × October 2016                | 0.0043                    |
|                                      | (0.0044)                  |
| Female × November 2016               | -0.0072*                  |
|                                      | (0.0041)                  |
| Female × December 2016               | -0.0013                   |
|                                      | (0.0041)                  |
| Female × January 2017                | 0.0025                    |
|                                      | (0.0046)                  |
| Female × February 2017               | -0.0011                   |
|                                      | (0.0045)                  |
| March 2016 × Net Income              | 0.0244                    |
|                                      | (0.0201)                  |
| April 2016 × Net Income              | 0.0677                    |
|                                      | (0.0561)                  |
| May 2016 × Net Income                | 0.0685                    |
|                                      | (0.0561)                  |
| June 2016 × Net Income               | 0.0450                    |
|                                      | (0.0587)                  |
| July 2016 × Net Income               | 0.0477                    |
|                                      | (0.0588)                  |
| August 2016 × Net Income             | 0.0469                    |
|                                      | (0.0595)                  |
| September 2016 × Net Income          | 0.0549                    |
|                                      | (0.0598)                  |
| October 2016 × Net Income            | 0.0837                    |
|                                      | (0.0604)                  |
| November 2016 × Net Income           | 0.0882                    |
|                                      | (0.0604)                  |
| December 2016 × Net Income           | 0.1304**                  |
|                                      | (0.0610)                  |
| January 2017 × Net Income            | 0.1168*                   |
|                                      | (0.0610)                  |
| February 2017 × Net Income           | 0.2114***                 |
|                                      | (0.0635)                  |
| Female × March 2016 × Net Income     | -0.0077                   |
|                                      | (0.0131)                  |
| Female × April 2016 × Net Income     | -0.0037                   |
|                                      | (0.0061)                  |
| Female × May 2016 × Net Income       | -0.0035                   |
|                                      | (0.0062)                  |
| Female × June 2016 × Net Income      | -0.0036                   |
|                                      | (0.0061)                  |
| Female × July 2016 × Net Income      | -0.0007                   |
|                                      | (0.0063)                  |
| Female × August 2016 × Net Income    | 0.0130                    |
|                                      | (0.0081)                  |
| Female × September 2016 × Net Income | 0.0048                    |
|                                      | (0.0088)                  |
| Female × October 2016 × Net Income   | -0.0046                   |
|                                      | (0.0063)                  |
| Female × November 2016 × Net Income  | 0.0035                    |
|                                      | (0.0067)                  |

|                                     |                       |
|-------------------------------------|-----------------------|
| Female × December 2016 × Net Income | -0.0036<br>(0.0061)   |
| Female × January 2017 × Net Income  | -0.0035<br>(0.0062)   |
| Female × February 2017 × Net Income | -0.0056<br>(0.0071)   |
| Constant                            | -0.0725**<br>(0.0343) |
| <hr/>                               |                       |
| Controls                            | Yes                   |
| Applicant fixed effects             | Yes                   |
| Job post fixed effects              | Yes                   |
| Company fixed effects               | Yes                   |
| Period fixed effects                | Yes                   |
| <hr/>                               |                       |
| Observations                        | 352,838               |
| R-squared                           | 0.427                 |
| <hr/>                               |                       |

Notes: This table evaluates the parallel trends assumption for difference-in-difference models by net income. Estimates are from ordinary-least-squares regressions (linear probability models). Robust standard errors are shown in parentheses; p-values correspond to two-tailed tests. \*\*\* p<0.01, \*\* p<0.05, \* p<0.1

**APPENDIX 7**  
**TABLE A7: MODELS PREDICTING APPLICATION BEHAVIOR**

|                               | (1)                                    | (2)                                                           |
|-------------------------------|----------------------------------------|---------------------------------------------------------------|
|                               | DV: Total<br>number of<br>applications | Fraction of<br>Applications to<br>Low Net Income<br>Companies |
| Post-March 1, 2017 = 1        | 0.7637***<br>(0.0061)                  | -0.1302***<br>(0.0041)                                        |
| Male × Post-March 1, 2017 = 1 | 0.9548***<br>(0.0096)                  | -0.0006<br>(0.0050)                                           |
| Constant                      | 1.5243***<br>(0.0052)                  | 0.3012***<br>(0.0017)                                         |
| Observations                  | 848,707                                | 401,902                                                       |
| R-squared                     |                                        | 0.388                                                         |
| Pseudo R-squared              | 0.1826                                 |                                                               |

Notes: This table evaluates the effect of the maternity leave act on application behavior. The unit of observation is the person × month. The dependent variables are the total count of applications submitted by the focal individual in the focal month (Model 1) and the fraction of applications to low net income companies (Model 2). Note that the reference group is Female; the estimated effect of the maternity leave legislation on women therefore correspond to the coefficient for Post-March 1, 2017. Estimates are from Poisson pseudo-maximum likelihood regressions (Model 1) and OLS regressions (Model 2). Coefficients for Model 1 are reported as incidence-rate ratios. Robust standard errors are shown in parentheses; p-values correspond to two-tailed tests. \*\*\* p<0.01, \*\* p<0.05, \* p<0.1

**APPENDIX 8**  
**TABLE A8: MODELS PREDICTING APPLICANT CHARACTERISTICS**

|                                              | DV: Applicant age      | DV: Number of skills  | DV: Grade percentage (GPA on 100 point scale) | DV: Total experience (months) |
|----------------------------------------------|------------------------|-----------------------|-----------------------------------------------|-------------------------------|
|                                              | (1)<br>OLS             | (2)<br>PPML           | (3)<br>OLS                                    | (4)<br>PPML                   |
| Female                                       | -0.2024***<br>(0.0096) | 0.8312***<br>(0.0028) | 2.8797***<br>(0.0252)                         | 0.7012***<br>(0.0054)         |
| Female × Post-March 1, 2017                  | -0.0334***<br>(0.0127) | 1.0613***<br>(0.0041) | 0.0342<br>(0.0324)                            | 0.8816***<br>(0.0103)         |
| Low Net Income                               | 0.0983<br>(0.0626)     | 1.0843***<br>(0.0217) | 0.5208***<br>(0.1661)                         | 0.9944<br>(0.0493)            |
| Post-March 1, 2017 × Low Net Income          | 0.0195<br>(0.1010)     | 1.0946***<br>(0.0324) | 0.5084**<br>(0.2468)                          | 1.0920<br>(0.0819)            |
| Female × Low Net Income                      | 0.0155<br>(0.0192)     | 0.9781***<br>(0.0063) | 0.2980***<br>(0.0492)                         | 0.9886<br>(0.0152)            |
| Female × Post-March 1, 2017 × Low Net Income | 0.0286<br>(0.0253)     | 1.0110<br>(0.0074)    | 0.0954<br>(0.0631)                            | 1.1178***<br>(0.0253)         |
| Constant                                     | 23.2017***<br>(0.3271) | 4.6730***<br>(0.3520) | 70.9512***<br>(0.7814)                        | 4.7399***<br>(1.2683)         |
| Controls                                     | Yes                    | Yes                   | Yes                                           | Yes                           |
| Applicant fixed effects                      | No                     | No                    | No                                            | No                            |
| Job post fixed effects                       | Yes                    | Yes                   | Yes                                           | Yes                           |
| Company fixed effects                        | Yes                    | Yes                   | Yes                                           | Yes                           |
| Period fixed effects                         | Yes                    | Yes                   | Yes                                           | Yes                           |
| Observations                                 | 1,328,109              | 1,330,665             | 1,283,390                                     | 1,301,060                     |
| R-squared                                    | 0.045                  |                       | 0.080                                         |                               |
| Pseudo R-squared                             |                        | 0.0283                |                                               | 0.0812                        |

Notes: This table evaluates the effect of the maternity leave act on applicant age, skills, education, and experience. Estimates in Models 1 and 3 are from ordinary-least-squares regressions. Estimates in Models 2 and 4 are from Poisson pseudo-maximum likelihood regressions; coefficients are reported as incidence-rate ratios. Control variables adjust for nApplicationsTMaleJobRole, nApplicationsTFemaleJobRole, nApplicantsTMaleJobRole, nApplicantsTFemaleJobRole, nJobPostTJobRole, CompanyNJobT, CompanyNApplicationsT, and indicator variables for ApplicationType. Robust standard errors are in parentheses.

\*\*\* p<0.01, \*\* p<0.05, \* p<0.1

**APPENDIX 9**  
**TABLE A9: MODELS PREDICTING CHARACTERISTICS OF APPLICANTS**  
**WHO MADE THEIR FIRST APPLICATION PRE- VERSUS POST-LAW**

|                                                     | DV:<br>Applicant<br>age<br>(1)<br>OLS | DV:<br>Applicant<br>age<br>(2)<br>OLS | DV:<br>Number<br>of skills<br>(3)<br>PPML | DV:<br>Number<br>of skills<br>(4)<br>PPML | DV: Grade<br>percentage<br>(GPA on<br>100 point<br>scale)<br>(5)<br>OLS | DV: Grade<br>percentage<br>(GPA on<br>100 point<br>scale)<br>(6)<br>OLS | DV: Total<br>experience<br>(months)<br>(7)<br>PPML | DV: Total<br>experience<br>(months)<br>(8)<br>PPML |
|-----------------------------------------------------|---------------------------------------|---------------------------------------|-------------------------------------------|-------------------------------------------|-------------------------------------------------------------------------|-------------------------------------------------------------------------|----------------------------------------------------|----------------------------------------------------|
| First Application is Post-March 1, 2017             | -0.1522***<br>(0.0107)                | -0.1433***<br>(0.0134)                | 1.1399***<br>(0.0035)                     | 1.1061***<br>(0.0043)                     | 0.1216***<br>(0.0255)                                                   | -0.0077<br>(0.0323)                                                     | 0.6248***<br>(0.0057)                              | 0.6475***<br>(0.0072)                              |
| Female                                              | -0.2272***<br>(0.0112)                | -0.2149***<br>(0.0148)                | 0.8694***<br>(0.0027)                     | 0.8277***<br>(0.0045)                     | 3.5759***<br>(0.0263)                                                   | 3.4024***<br>(0.0372)                                                   | 0.6281***<br>(0.0058)                              | 0.6620***<br>(0.0074)                              |
| First Application is Post-March 1, 2017 ×<br>Female |                                       | -0.0226<br>(0.0222)                   |                                           | 1.0883***<br>(0.0072)                     |                                                                         | 0.3298***<br>(0.0525)                                                   |                                                    | 0.8835***<br>(0.0167)                              |
| Constant                                            | 23.6798***<br>(0.0081)                | 23.6751***<br>(0.0088)                | 3.1621***<br>(0.0087)                     | 3.2153***<br>(0.0098)                     | 68.9442***<br>(0.0203)                                                  | 69.0097***<br>(0.0224)                                                  | 5.3965***<br>(0.0321)                              | 5.3174***<br>(0.0341)                              |
| Observations                                        | 400,400                               | 400,400                               | 401,712                                   | 401,712                                   | 373,806                                                                 | 373,806                                                                 | 401,712                                            | 401,712                                            |
| R-squared                                           | 0.002                                 | 0.002                                 |                                           |                                           | 0.048                                                                   | 0.048                                                                   |                                                    |                                                    |
| Pseudo R-squared                                    |                                       |                                       | 0.0049                                    | 0.0051                                    |                                                                         |                                                                         | 0.0267                                             | 0.0269                                             |

Notes: This table evaluates the effect of the maternity leave act on applicant age, skills, education, and experience. Estimates in Models 1, 2, 5, and 6 are from ordinary-least-squares regressions. Estimates in Models 3, 4, 7, and 8 are from Poisson pseudo-maximum likelihood regressions; coefficients are reported as incidence-rate ratios. Robust standard errors are in parentheses.

\*\*\* p<0.01, \*\* p<0.05, \* p<0.1
